# Supplementary material for: Phase behavior of n-hexane confined in unconsolidated nanoporous media: an experimental investigation at varying pore sizes and temperatures
Source: Royal Society of Chemistry journal article supplement (doi:10.1039/d4cp00936c), 2024-01-01
Supplement: d4cp00936c1.pdf [file d4cp00936c1.pdf]

**Supplementary Material for:**

**Phase Behavior of n-Hexane Confined in Unconsolidated  
Nanoporous Media: An Experimental Investigation at Varying Pore  
Sizes and Temperatures**

*Keerti Vardhan Sharma\*, Rami Mohamed Alloush, Omer Salim, and Mohammad Piri*

*Center of Innovation for Flow through Porous Media, Department of Energy and Petroleum  
Engineering, University of Wyoming, Laramie, Wyoming 82071, USA*

**Keywords:** Confined fluids; Hexane; Nanoporous Media; Nanopores; Adsorption; Gravimetry

## Supporting Information

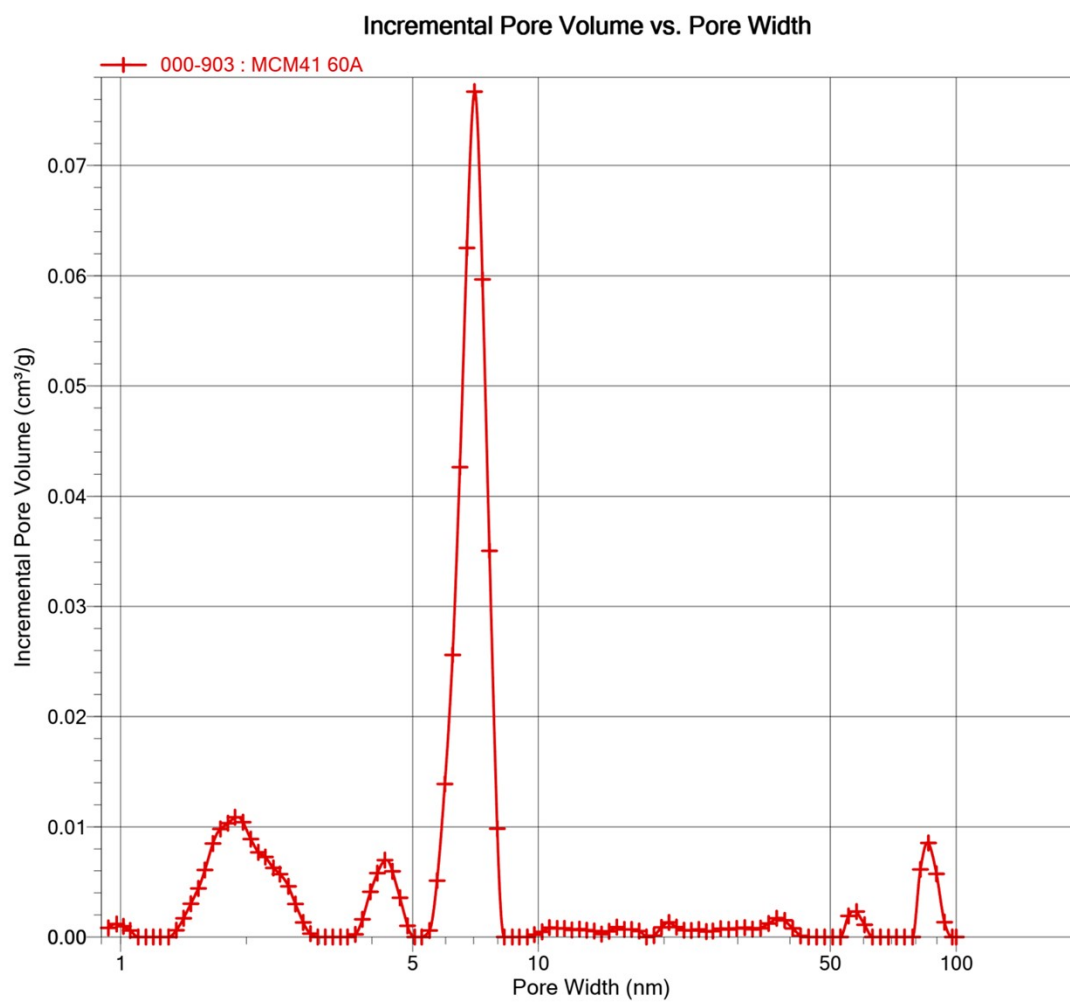

**Figure S1.** Incremental pore volume vs. pore width for MCM-41 60Å

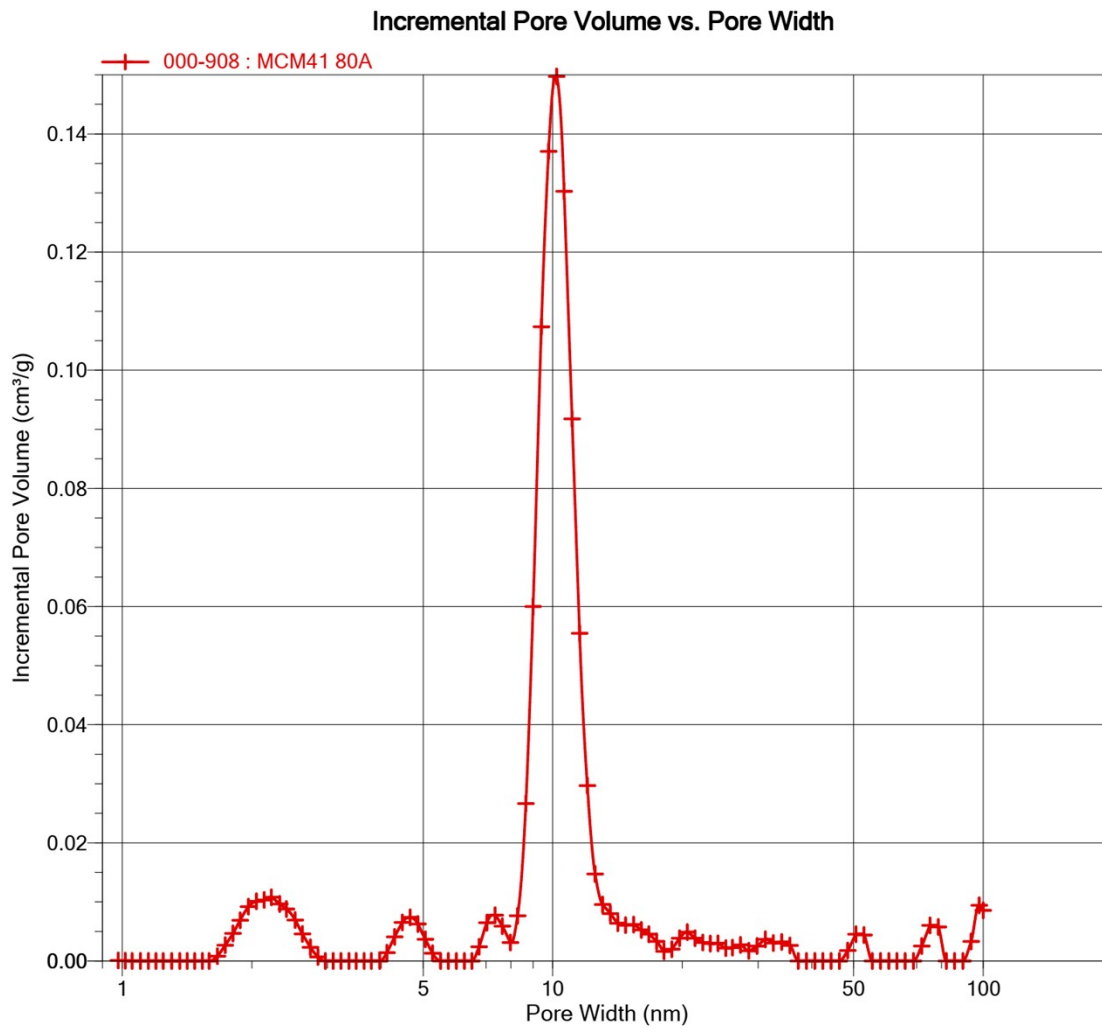

**Figure S2.** Incremental pore volume vs. pore width for MCM-41 80Å

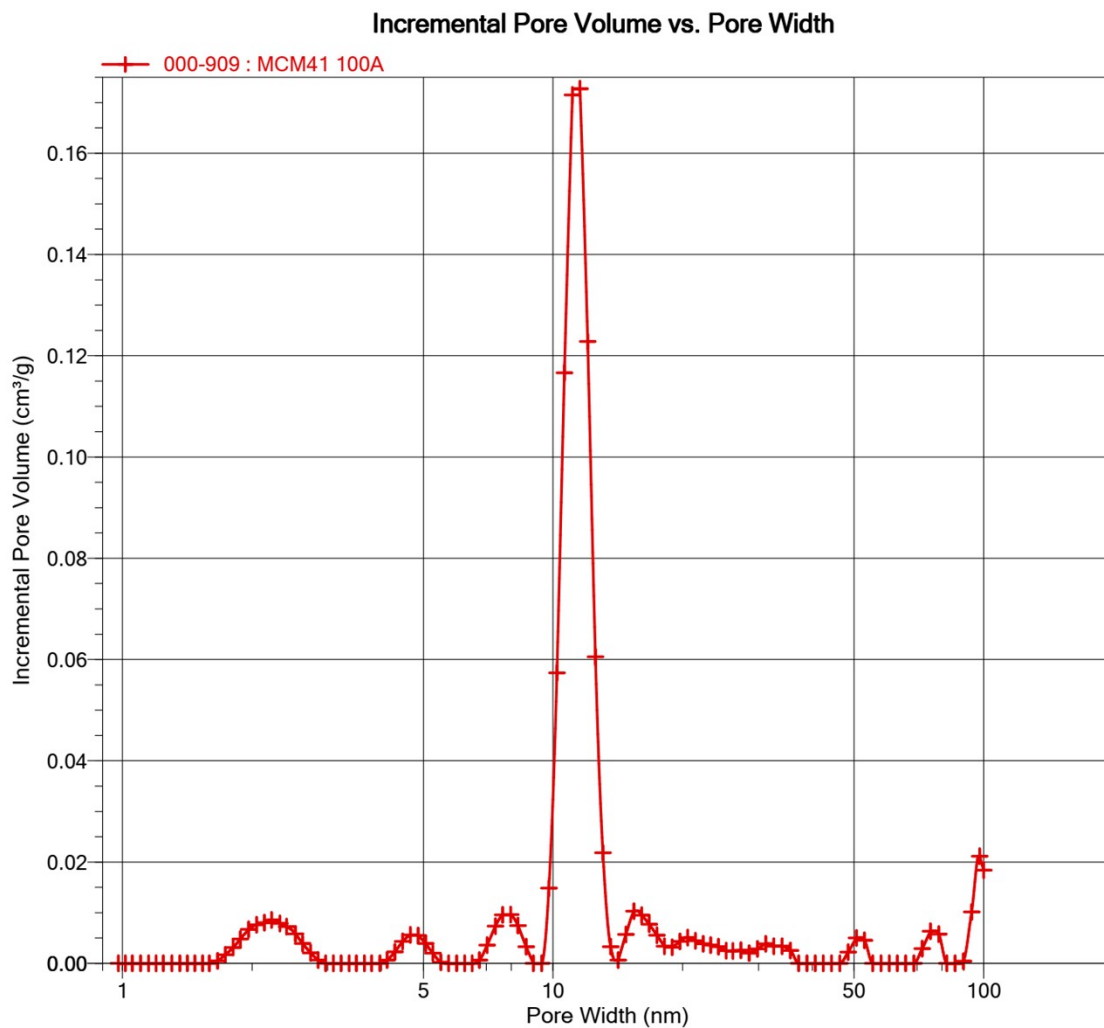

**Figure S3.** Incremental pore volume vs. pore width for MCM-41 100Å

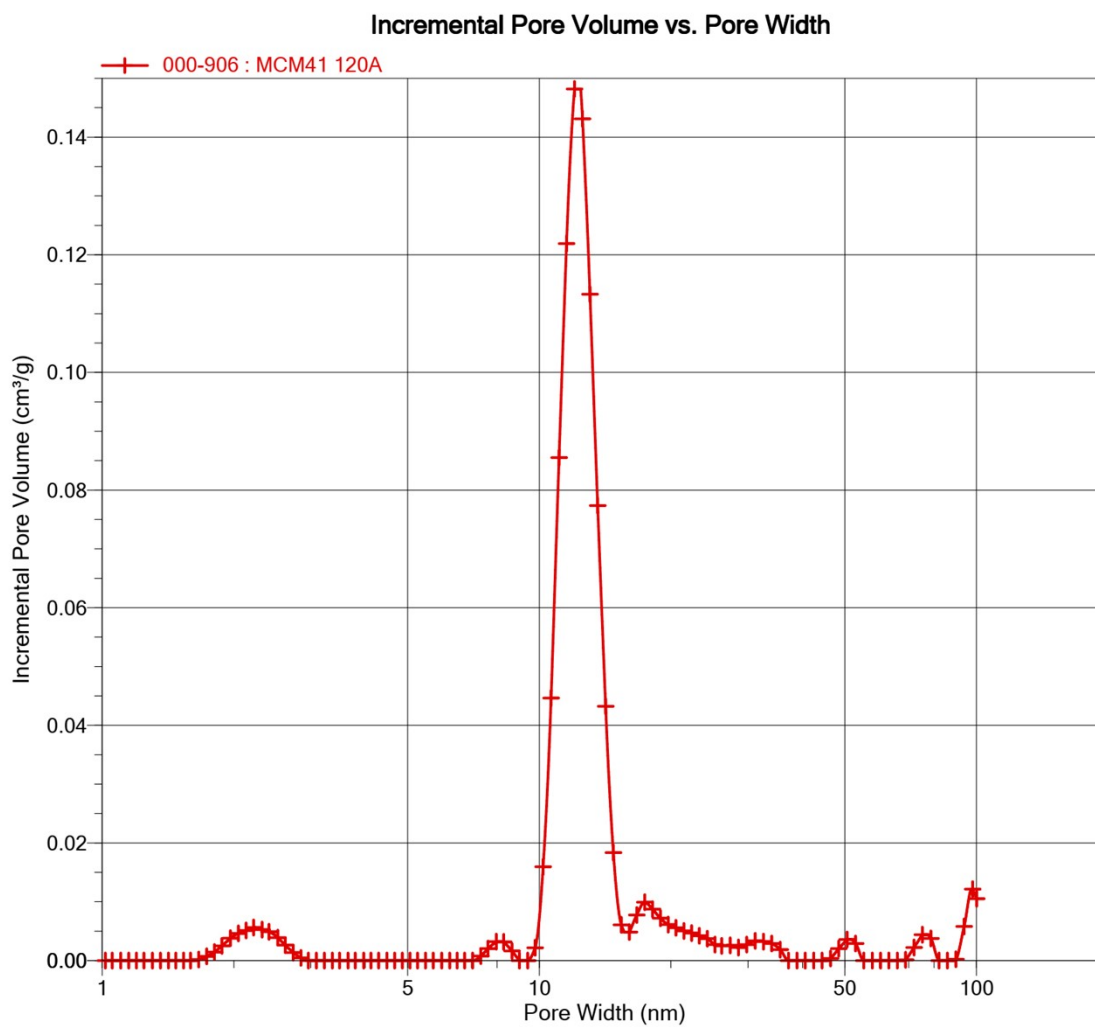

**Figure S4.** Incremental pore volume vs. pore width for MCM-41 120Å

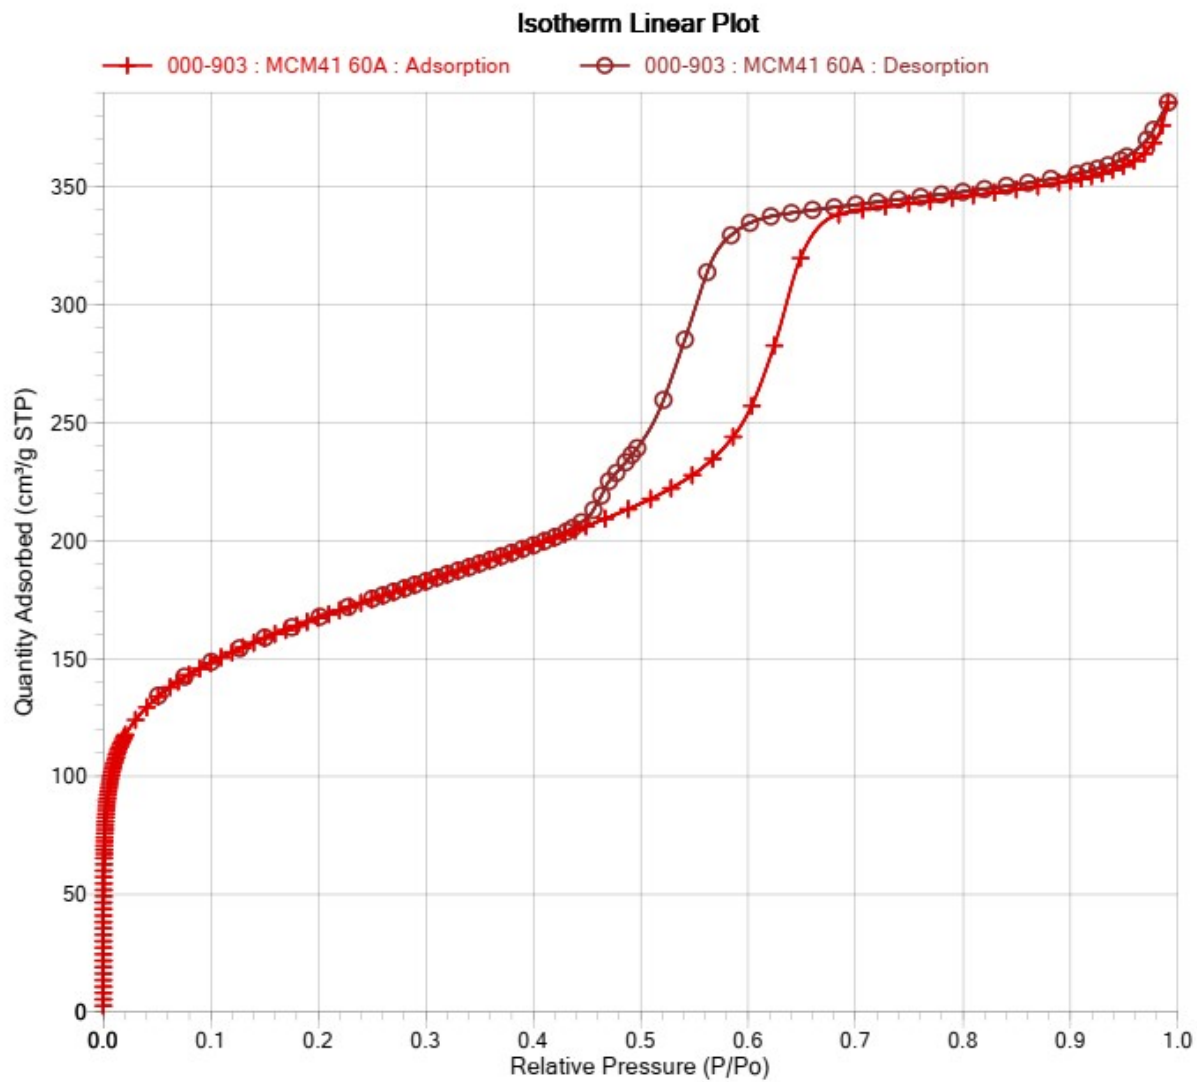

**Figure S5.** Isotherm Linear Plot for MCM-41 60Å showing Quantity Adsorbed (cm<sup>3</sup>/g STP) vs Relative Pressure (P/Po) for N<sub>2</sub> at bath temperature of 77.390 K.

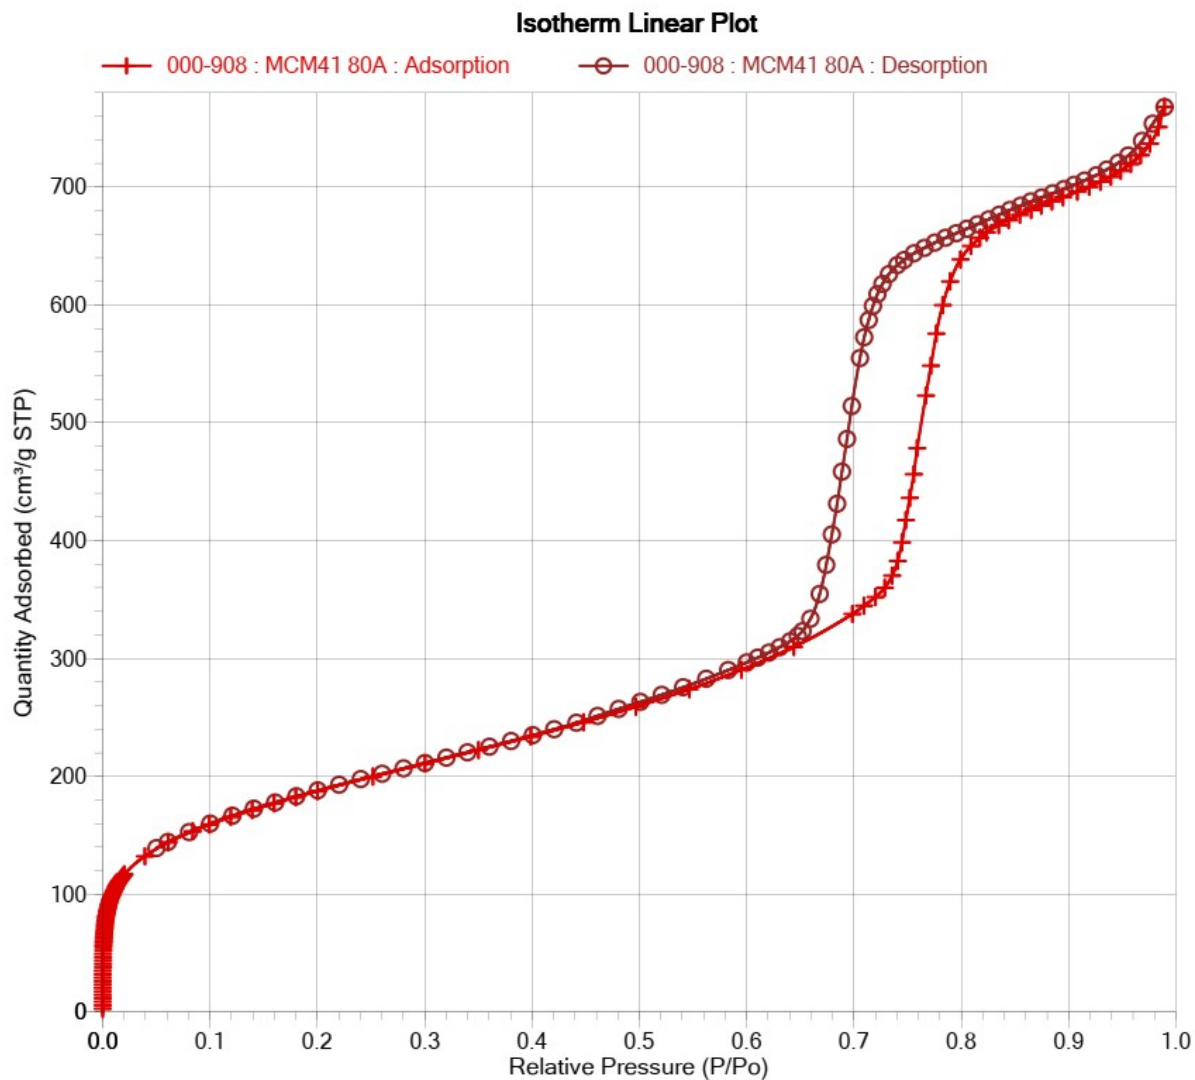

**Figure S6.** Isotherm Linear Plot for MCM-41 80Å showing Quantity Adsorbed (cm<sup>3</sup>/g STP) vs Relative Pressure (P/Po) for N<sub>2</sub> at bath temperature of 77.390 K.

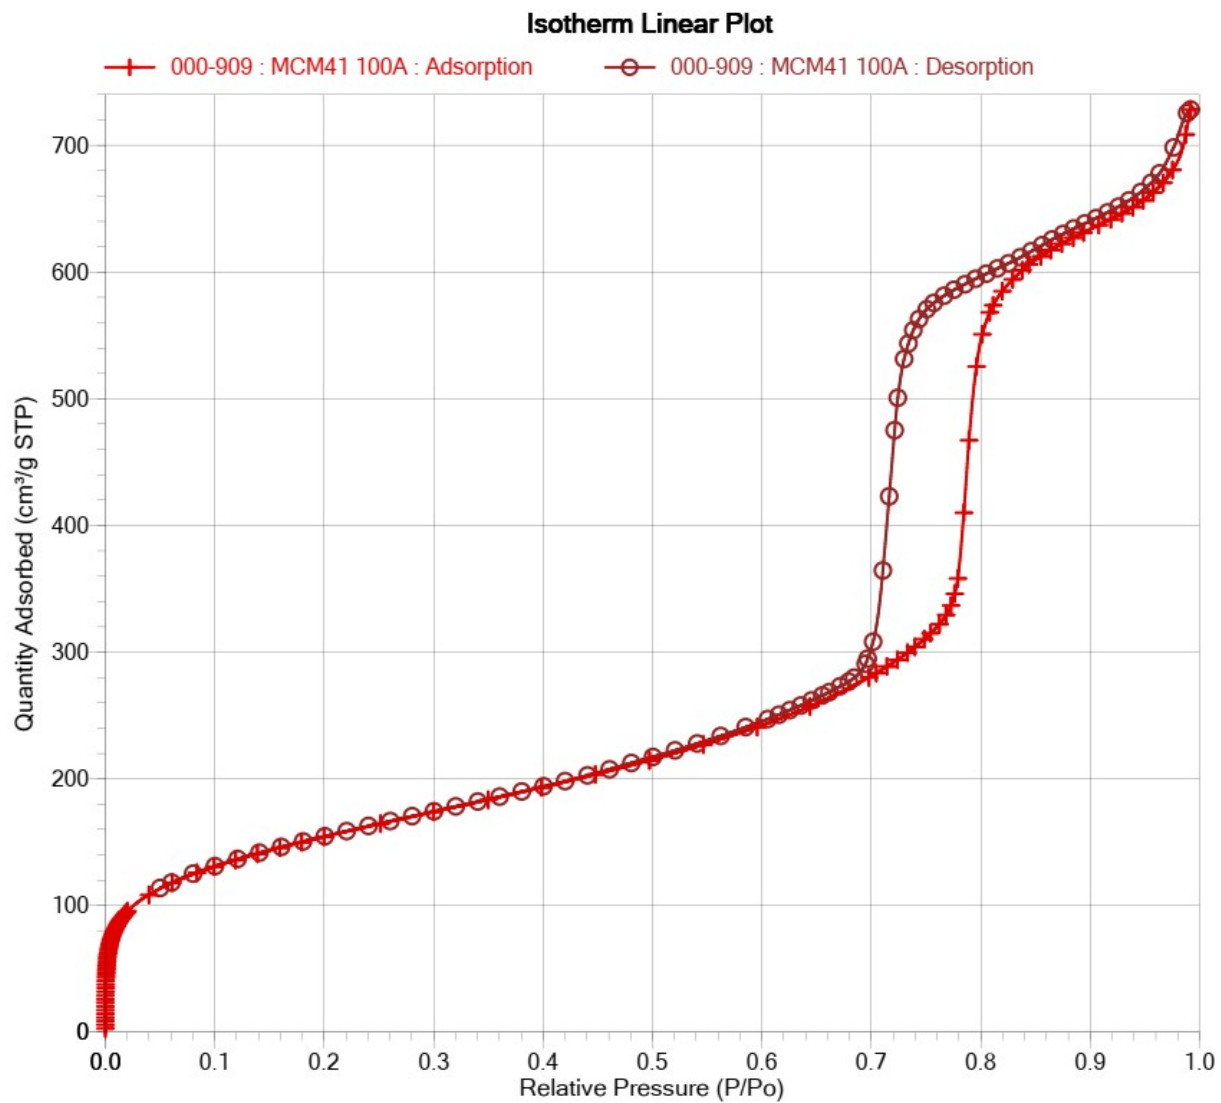

**Figure S7.** Isotherm Linear Plot for MCM-41 100Å showing Quantity Adsorbed (cm<sup>3</sup>/g STP) vs Relative Pressure (P/Po) for N<sub>2</sub> at bath temperature of 77.390 K.



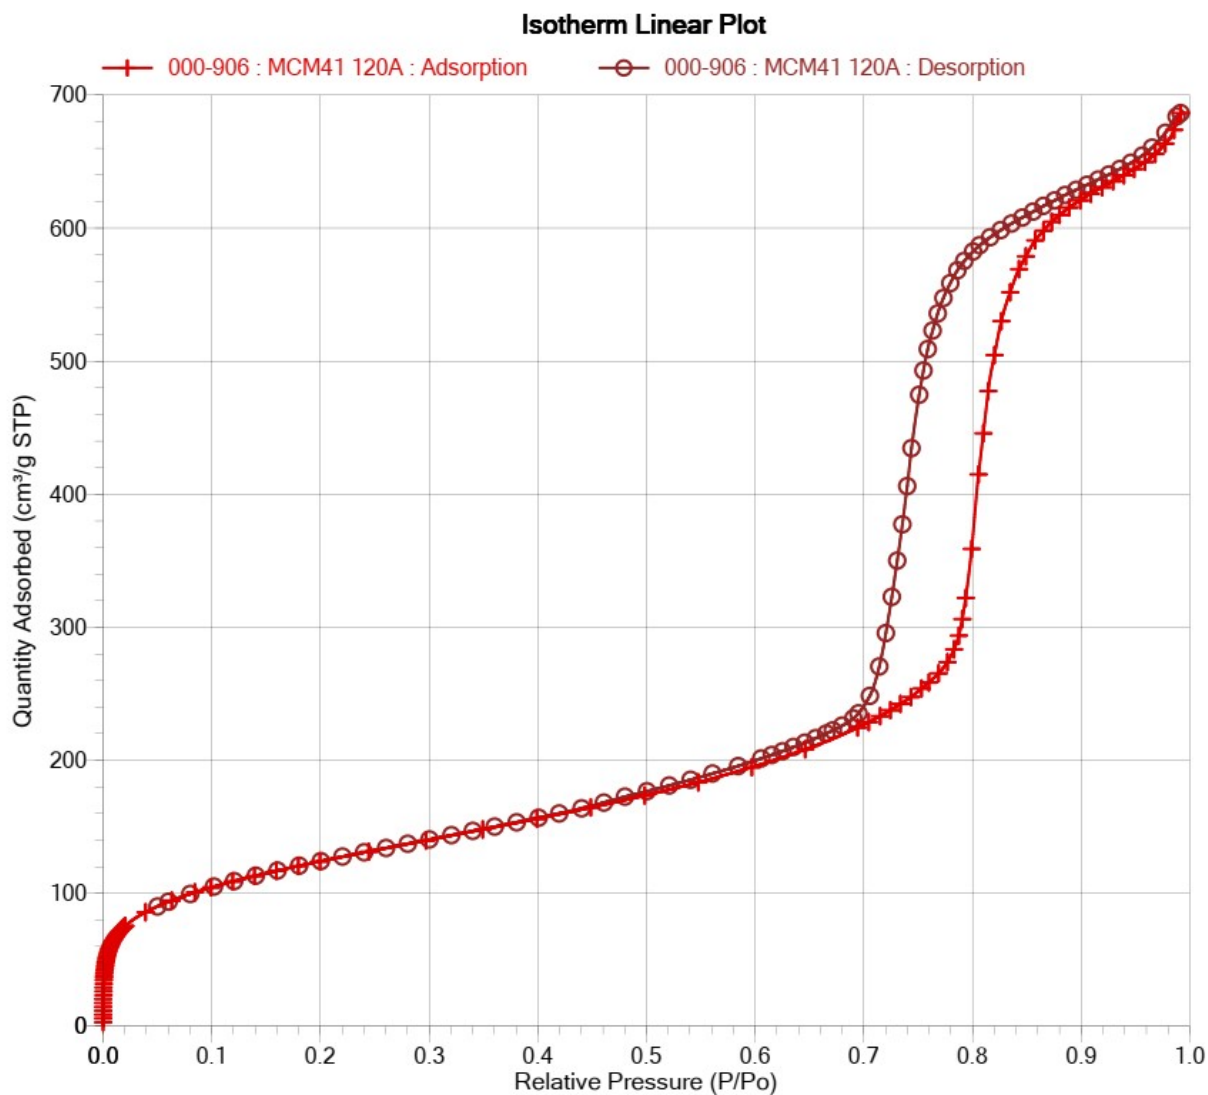

**Figure S8.** Isotherm Linear Plot for MCM-41 120Å showing Quantity Adsorbed (cm<sup>3</sup>/g STP) vs Relative Pressure (P/Po) for N<sub>2</sub> at bath temperature of 77.390 K.

**Table S1.** Experimentally measured values of pressure and mass during adsorption of Hexane in MCM-41 at +50°C.

| 6 nm     |       | 8 nm     |       | 10 nm    |       | 12 nm    |       |
|----------|-------|----------|-------|----------|-------|----------|-------|
| Pressure | Mass  | Pressure | Mass  | Pressure | Mass  | Pressure | Mass  |
| bar      | g     | bar      | g     | bar      | g     | bar      | g     |
| 0.000    | 0.000 | 0.000    | 0.000 | 0.000    | 0.000 | 0.000    | 0.000 |
| 0.034    | 0.368 | 0.096    | 0.387 | 0.105    | 0.477 | 0.178    | 0.435 |
| 0.118    | 0.694 | 0.180    | 0.632 | 0.177    | 0.714 | 0.180    | 0.428 |
| 0.177    | 0.893 | 0.188    | 0.639 | 0.187    | 0.734 | 0.192    | 0.447 |
| 0.189    | 0.903 | 0.188    | 0.651 | 0.196    | 0.784 | 0.194    | 0.452 |
| 0.195    | 0.919 | 0.195    | 0.671 | 0.207    | 0.832 | 0.204    | 0.463 |
| 0.202    | 0.946 | 0.201    | 0.692 | 0.216    | 0.855 | 0.210    | 0.467 |
| 0.206    | 0.974 | 0.206    | 0.713 | 0.225    | 0.891 | 0.215    | 0.492 |
| 0.210    | 0.995 | 0.207    | 0.720 | 0.231    | 0.922 | 0.216    | 0.491 |
| 0.214    | 0.995 | 0.214    | 0.738 | 0.231    | 0.955 | 0.226    | 0.504 |
| 0.216    | 1.016 | 0.221    | 0.751 | 0.239    | 0.960 | 0.229    | 0.496 |
| 0.224    | 1.043 | 0.223    | 0.772 | 0.242    | 1.003 | 0.235    | 0.502 |
| 0.226    | 1.061 | 0.230    | 0.788 | 0.252    | 1.014 | 0.243    | 0.528 |
| 0.236    | 1.102 | 0.233    | 0.819 | 0.260    | 1.054 | 0.248    | 0.559 |
| 0.242    | 1.122 | 0.245    | 0.843 | 0.264    | 1.068 | 0.261    | 0.565 |
| 0.249    | 1.178 | 0.250    | 0.851 | 0.270    | 1.078 | 0.265    | 0.575 |
| 0.250    | 1.215 | 0.255    | 0.858 | 0.276    | 1.108 | 0.270    | 0.584 |
| 0.254    | 1.227 | 0.256    | 0.866 | 0.278    | 1.122 | 0.275    | 0.583 |
| 0.257    | 1.314 | 0.262    | 0.883 | 0.284    | 1.154 | 0.280    | 0.600 |
| 0.264    | 1.427 | 0.270    | 0.893 | 0.295    | 1.177 | 0.291    | 0.619 |
| 0.277    | 1.728 | 0.283    | 0.928 | 0.299    | 1.228 | 0.299    | 0.637 |
| 0.282    | 1.852 | 0.284    | 0.971 | 0.309    | 1.275 | 0.306    | 0.672 |
| 0.291    | 1.967 | 0.291    | 0.981 | 0.316    | 1.284 | 0.318    | 0.692 |
| 0.295    | 2.033 | 0.301    | 1.043 | 0.320    | 1.335 | 0.316    | 0.720 |
| 0.307    | 2.066 | 0.310    | 1.100 | 0.329    | 1.362 | 0.328    | 0.759 |
| 0.312    | 2.079 | 0.321    | 1.106 | 0.333    | 1.404 | 0.335    | 0.787 |
| 0.317    | 2.081 | 0.331    | 1.194 | 0.337    | 1.424 | 0.340    | 0.813 |
| 0.338    | 2.096 | 0.338    | 1.290 | 0.343    | 1.494 | 0.349    | 0.852 |
| 0.340    | 2.093 | 0.340    | 1.463 | 0.350    | 1.564 | 0.358    | 0.922 |
| 0.342    | 2.097 | 0.348    | 1.690 | 0.350    | 2.041 | 0.362    | 1.026 |
| 0.359    | 2.104 | 0.357    | 1.857 | 0.356    | 2.255 | 0.366    | 1.203 |

|         |       |         |       |         |       |         |       |
|---------|-------|---------|-------|---------|-------|---------|-------|
| 0.372   | 2.109 | 0.358   | 2.162 | 0.358   | 2.346 | 0.372   | 1.318 |
| 0.382   | 2.109 | 0.370   | 2.281 | 0.359   | 2.431 | 0.374   | 1.489 |
| 0.395   | 2.122 | 0.373   | 2.457 | 0.359   | 2.513 | 0.375   | 1.619 |
| 0.400   | 2.120 | 0.386   | 2.629 | 0.366   | 2.606 | 0.387   | 1.791 |
| 0.399   | 2.126 | 0.396   | 2.678 | 0.367   | 2.742 | 0.390   | 1.994 |
| 0.426   | 2.139 | 0.395   | 2.723 | 0.369   | 2.827 | 0.393   | 2.177 |
| 0.435   | 2.149 | 0.412   | 2.755 | 0.371   | 2.943 | 0.394   | 2.292 |
| 0.445   | 2.156 | 0.414   | 2.703 | 0.371   | 2.999 | 0.398   | 2.370 |
| 0.449   | 2.160 | 0.424   | 2.910 | 0.373   | 3.091 | 0.404   | 2.689 |
| 0.45457 | 2.161 | 0.43333 | 2.934 | 0.37347 | 3.284 | 0.41608 | 2.676 |
| 0.4802  | 2.215 | 0.44683 | 2.968 | 0.37922 | 3.354 | 0.43461 | 2.76  |
| 0.48134 | 2.215 | 0.45414 | 2.987 | 0.38355 | 3.389 | 0.43653 | 2.795 |
| 0.50122 | 2.261 | 0.46735 | 3.018 | 0.39008 | 3.397 | 0.4469  | 2.822 |
| 0.5096  | 2.276 | 0.47438 | 3.017 | 0.39506 | 3.433 | 0.45719 | 2.863 |
| 0.51869 | 2.358 | 0.47907 | 3.048 | 0.40301 | 3.474 | 0.46465 | 2.881 |
| 0.52516 | 2.442 | 0.48929 | 3.07  | 0.39733 | 3.482 | 0.47268 | 2.913 |
| 0.52927 | 2.579 | 0.50065 | 3.101 | 0.404   | 3.509 | 0.48091 | 2.946 |
| 0.53758 | 2.751 | 0.50662 | 3.123 | 0.41111 | 3.533 | 0.49206 | 2.983 |
| 0.53915 | 2.925 | 0.51763 | 3.225 | 0.41551 | 3.572 | 0.49952 | 3.017 |
| --      |       | 0.52523 | 3.312 | 0.42098 | 3.594 | 0.50776 | 3.029 |
| --      |       | 0.52828 | 3.364 | 0.42311 | 3.633 | 0.5118  | 3.073 |
| --      |       | 0.53453 | 3.38  | 0.43376 | 3.646 | 0.51656 | 3.092 |
| --      |       | 0.53403 | 3.387 | 0.43845 | 3.671 | 0.52089 | 3.11  |
| --      |       | --      |       | 0.43695 | 3.671 | 0.52416 | 3.163 |
| --      |       | --      |       | 0.4486  | 3.705 | 0.52601 | 3.253 |
| --      |       | --      |       | 0.45336 | 3.739 | --      |       |
| --      |       | --      |       | 0.46366 | 3.777 | --      |       |
| --      |       | --      |       | 0.4692  | 3.794 | --      |       |
| --      |       | --      |       | 0.47807 | 3.836 | --      |       |
| --      |       | --      |       | 0.48155 | 3.864 | --      |       |
| --      |       | --      |       | 0.49114 | 3.912 | --      |       |
| --      |       | --      |       | 0.49952 | 3.939 | --      |       |
| --      |       | --      |       | 0.50456 | 3.964 | --      |       |
| --      |       | --      |       | 0.50705 | 4.01  | --      |       |
| --      |       | --      |       | 0.51365 | 4.073 | --      |       |

**Table S2.** Experimentally measured values of pressure and mass during desorption of Hexane in MCM-41 at +50°C.

| 6 nm     |       | 8 nm     |       | 10 nm    |       |
|----------|-------|----------|-------|----------|-------|
| Pressure | Mass  | Pressure | Mass  | Pressure | Mass  |
| bar      | g     | bar      | g     | bar      | g     |
| 0.527    | 3.348 | 0.530    | 5.897 | 0.525    | 7.044 |
| 0.525    | 2.806 | 0.530    | 5.120 | 0.520    | 6.158 |
| 0.505    | 2.435 | 0.524    | 4.415 | 0.514    | 5.486 |
| 0.462    | 2.327 | 0.511    | 3.828 | 0.509    | 4.829 |
| 0.434    | 2.298 | 0.500    | 3.314 | 0.499    | 4.297 |
| 0.419    | 2.283 | 0.473    | 3.143 | 0.472    | 3.976 |
| 0.399    | 2.271 | 0.448    | 3.055 | 0.445    | 3.825 |
| 0.383    | 2.260 | 0.424    | 2.994 | 0.422    | 3.737 |
| 0.369    | 2.242 | 0.411    | 2.956 | 0.405    | 3.646 |
| 0.353    | 2.232 | 0.393    | 2.900 | 0.383    | 3.561 |
| 0.350    | 2.228 | 0.378    | 2.854 | 0.367    | 3.494 |
| 0.340    | 2.216 | 0.364    | 2.811 | 0.357    | 3.403 |
| 0.334    | 2.210 | 0.351    | 2.769 | 0.350    | 3.258 |
| 0.321    | 2.202 | 0.343    | 2.690 | 0.343    | 3.095 |
| 0.309    | 2.196 | 0.340    | 2.547 | 0.335    | 2.752 |
| 0.299    | 2.182 | 0.339    | 2.423 | 0.331    | 2.375 |
| 0.292    | 2.172 | 0.331    | 2.186 | 0.330    | 1.982 |
| 0.279    | 2.159 | 0.325    | 1.913 | 0.328    | 1.582 |
| 0.279    | 2.158 | 0.322    | 1.622 | 0.319    | 1.342 |
| 0.272    | 2.144 | 0.317    | 1.355 | 0.316    | 1.285 |
| 0.259    | 2.103 | 0.313    | 1.172 | 0.306    | 1.241 |
| 0.250    | 1.972 | 0.296    | 1.090 | 0.298    | 1.201 |
| 0.235    | 1.678 | 0.289    | 1.051 | 0.290    | 1.148 |
| 0.231    | 1.376 | 0.275    | 1.012 | 0.279    | 1.113 |
| 0.226    | 1.207 | 0.270    | 0.981 | 0.268    | 1.073 |
| 0.218    | 1.145 | 0.267    | 0.939 | 0.260    | 1.037 |
| 0.219    | 1.122 | 0.252    | 0.915 | 0.253    | 1.020 |
| 0.217    | 1.099 | 0.243    | 0.885 | 0.245    | 0.993 |
| 0.210    | 1.087 | 0.244    | 0.866 | 0.245    | 0.981 |
| 0.210    | 1.084 | 0.238    | 0.854 | 0.238    | 0.961 |
| 0.212    | 1.080 | 0.237    | 0.842 | 0.237    | 0.943 |

|         |       |         |       |         |       |
|---------|-------|---------|-------|---------|-------|
| 0.202   | 1.062 | 0.228   | 0.833 | 0.231   | 0.924 |
| 0.203   | 1.063 | 0.224   | 0.807 | 0.227   | 0.905 |
| 0.204   | 1.047 | 0.223   | 0.796 | 0.225   | 0.881 |
| 0.200   | 1.039 | 0.216   | 0.785 | 0.212   | 0.862 |
| 0.203   | 1.042 | 0.220   | 0.777 | 0.211   | 0.852 |
| 0.196   | 1.048 | 0.214   | 0.768 | 0.212   | 0.848 |
| 0.201   | 1.039 | 0.209   | 0.767 | 0.211   | 0.843 |
| 0.200   | 1.046 | 0.213   | 0.765 | 0.207   | 0.842 |
| 0.199   | 1.040 | 0.207   | 0.772 | 0.213   | 0.831 |
| 0.19905 | 1.033 | 0.21425 | 0.773 | 0.20538 | 0.83  |
| 0.19806 | 1.03  | 0.21134 | 0.774 | 0.20814 | 0.837 |
| 0.20005 | 1.03  | 0.20538 | 0.77  | 0.2058  | 0.83  |
| 0.20005 | 1.025 | 0.20942 | 0.771 | 0.20381 | 0.836 |
| 0.19479 | 1.02  | 0.20339 | 0.763 | 0.209   | 0.822 |
| 0.19763 | 1.019 | 0.20807 | 0.752 | 0.20339 | 0.826 |
| 0.19465 | 1.01  | 0.20403 | 0.747 | 0.20836 | 0.83  |
| 0.1955  | 1.014 | 0.20119 | 0.742 | 0.20502 | 0.829 |
| 0.19337 | 1.013 | 0.20175 | 0.737 | 0.20225 | 0.82  |
| 0.19472 | 0.995 | 0.2036  | 0.732 | 0.19692 | 0.803 |
| 0.18883 | 0.984 | 0.19756 | 0.72  | 0.19217 | 0.799 |
| 0.18741 | 0.975 | 0.19522 | 0.71  | 0.19636 | 0.804 |
| 0.18549 | 0.977 | 0.19558 | 0.702 | 0.19586 | 0.806 |
| 0.19288 | 0.982 | 0.1916  | 0.701 | 0.19913 | 0.804 |
| 0.18599 | 0.977 | 0.19806 | 0.705 | 0.19465 | 0.803 |
| 0.1862  | 0.985 | 0.19004 | 0.702 | 0.19927 | 0.804 |
| 0.18407 | 0.983 | 0.1921  | 0.706 | 0.19863 | 0.797 |
| 0.18485 | 0.976 | 0.196   | 0.709 | 0.19444 | 0.785 |
| 0.18592 | 0.961 | 0.19536 | 0.701 | 0.18826 | 0.775 |
| 0.18222 | 0.955 | 0.19181 | 0.697 | 0.19025 | 0.777 |
| 0.18265 | 0.957 | 0.18996 | 0.691 | 0.18684 | 0.773 |
| 0.18095 | 0.964 | 0.19224 | 0.693 | 0.18925 | 0.772 |
| 0.18215 | 0.963 | 0.18989 | 0.697 | 0.18649 | 0.77  |
| 0.18364 | 0.97  | 0.19245 | 0.697 | 0.19139 | 0.764 |
| 0.18663 | 0.97  | 0.18975 | 0.696 | 0.18308 | 0.756 |
| 0.18762 | 0.964 | 0.19238 | 0.69  | 0.18435 | 0.753 |

|         |       |         |       |         |       |
|---------|-------|---------|-------|---------|-------|
| 0.18173 | 0.955 | 0.19103 | 0.689 | 0.18457 | 0.747 |
| 0.1774  | 0.952 | 0.19067 | 0.685 | 0.18627 | 0.752 |
| 0.17157 | 0.939 | 0.18421 | 0.683 | 0.18464 | 0.748 |
| 0.17242 | 0.92  | 0.19131 | 0.682 | 0.18322 | 0.75  |
| 0.16546 | 0.914 | 0.18819 | 0.678 | 0.18656 | 0.755 |
| 0.1617  | 0.902 | 0.18102 | 0.682 | 0.18677 | 0.75  |
| 0.15978 | 0.883 | 0.18734 | 0.684 | 0.18222 | 0.741 |
| 0.1541  | 0.872 | 0.18542 | 0.682 | 0.18208 | 0.733 |
| 0.1502  | 0.86  | 0.18343 | 0.678 | 0.17981 | 0.734 |
| 0.14771 | 0.837 | 0.18095 | 0.664 | 0.18194 | 0.735 |
| 0.13876 | 0.829 | 0.17882 | 0.647 | 0.18301 | 0.737 |
| 0.13798 | 0.816 | 0.17313 | 0.631 | 0.18379 | 0.737 |
| 0.13351 | 0.803 | 0.16504 | 0.615 | 0.18208 | 0.715 |
| 0.13116 | 0.788 | 0.16078 | 0.602 | 0.17285 | 0.692 |
| 0.12499 | 0.777 | 0.15936 | 0.588 | 0.16745 | 0.674 |
| 0.12371 | 0.767 | 0.14956 | 0.572 | 0.16312 | 0.656 |
| 0.12371 | 0.748 | 0.1519  | 0.563 | 0.15957 | 0.637 |
| 0.11739 | 0.741 | 0.14366 | 0.551 | 0.15084 | 0.615 |
| 0.11114 | 0.731 | 0.13919 | 0.536 | 0.14544 | 0.603 |
| 0.10858 | 0.719 | 0.13592 | 0.524 | 0.13848 | 0.585 |
| 0.10901 | 0.707 | 0.13614 | 0.512 | 0.12889 | 0.569 |
| 0.10503 | 0.699 | 0.12307 | 0.502 | 0.12364 | 0.555 |
| 0.09772 | 0.689 | 0.12278 | 0.492 | 0.12399 | 0.544 |
| 0.09836 | 0.684 | 0.12428 | 0.485 | 0.11852 | 0.522 |
| 0.09488 | 0.671 | 0.11788 | 0.472 | 0.11512 | 0.509 |
| 0.09133 | 0.661 | 0.11753 | 0.462 | 0.11164 | 0.499 |
| 0.08983 | 0.656 | 0.11568 | 0.455 | 0.10418 | 0.488 |
| 0.08863 | 0.648 | 0.10986 | 0.446 | 0.10269 | 0.473 |
| 0.08429 | 0.639 | 0.10922 | 0.438 | 0.09836 | 0.465 |
| 0.08437 | 0.632 | 0.10872 | 0.432 | 0.09899 | 0.456 |
| 0.08067 | 0.629 | 0.10368 | 0.424 | 0.09679 | 0.445 |
| 0.07989 | 0.623 | 0.09963 | 0.417 | --      |       |
| --      |       | 0.09722 | 0.41  | --      |       |
|         |       |         |       |         |       |

**Table S3.** Experimentally measured values of pressure and mass during adsorption of Hexane in MCM-41 at +60°C.

| 6 nm     |       | 8 nm     |       | 10 nm    |       | 12 nm    |       |
|----------|-------|----------|-------|----------|-------|----------|-------|
| Pressure | Mass  | Pressure | Mass  | Pressure | Mass  | Pressure | Mass  |
| bar      | g     | bar      | g     | bar      | g     | bar      | g     |
| 0.000    | 0.000 | 0.000    | 0.000 | 0.000    | 0.000 | 0.000    | 0.000 |
| 0.033    | 0.300 | 0.068    | 0.248 | 0.121    | 0.405 | 0.182    | 0.333 |
| 0.142    | 0.665 | 0.182    | 0.495 | 0.180    | 0.552 | 0.185    | 0.329 |
| 0.190    | 0.796 | 0.192    | 0.515 | 0.192    | 0.583 | 0.197    | 0.342 |
| 0.192    | 0.807 | 0.196    | 0.535 | 0.209    | 0.628 | 0.209    | 0.376 |
| 0.203    | 0.837 | 0.201    | 0.548 | 0.215    | 0.656 | 0.221    | 0.387 |
| 0.222    | 0.867 | 0.209    | 0.564 | 0.224    | 0.691 | 0.224    | 0.408 |
| 0.225    | 0.884 | 0.218    | 0.581 | 0.233    | 0.721 | 0.232    | 0.421 |
| 0.227    | 0.901 | 0.228    | 0.596 | 0.235    | 0.730 | 0.239    | 0.440 |
| 0.232    | 0.910 | 0.230    | 0.603 | 0.245    | 0.748 | 0.241    | 0.439 |
| 0.240    | 0.920 | 0.238    | 0.617 | 0.256    | 0.765 | 0.254    | 0.457 |
| 0.241    | 0.935 | 0.239    | 0.630 | 0.257    | 0.792 | 0.256    | 0.448 |
| 0.247    | 0.945 | 0.247    | 0.637 | 0.263    | 0.799 | 0.262    | 0.477 |
| 0.253    | 0.958 | 0.253    | 0.656 | 0.275    | 0.813 | 0.271    | 0.476 |
| 0.258    | 0.972 | 0.260    | 0.665 | 0.286    | 0.846 | 0.278    | 0.484 |
| 0.268    | 0.990 | 0.261    | 0.683 | 0.285    | 0.866 | 0.287    | 0.504 |
| 0.275    | 1.012 | 0.275    | 0.703 | 0.300    | 0.863 | 0.297    | 0.508 |
| 0.290    | 1.025 | 0.284    | 0.729 | 0.307    | 0.888 | 0.298    | 0.520 |
| 0.298    | 1.048 | 0.290    | 0.732 | 0.314    | 0.906 | 0.308    | 0.534 |
| 0.301    | 1.065 | 0.295    | 0.754 | 0.320    | 0.926 | 0.318    | 0.550 |
| 0.311    | 1.090 | 0.305    | 0.775 | 0.327    | 0.936 | 0.328    | 0.546 |
| 0.329    | 1.121 | 0.312    | 0.779 | 0.324    | 0.951 | 0.338    | 0.565 |
| 0.337    | 1.165 | 0.327    | 0.813 | 0.336    | 0.964 | 0.339    | 0.578 |
| 0.348    | 1.213 | 0.340    | 0.854 | 0.340    | 0.993 | 0.349    | 0.595 |
| 0.361    | 1.301 | 0.356    | 0.899 | 0.351    | 1.018 | 0.367    | 0.606 |
| 0.375    | 1.401 | 0.359    | 0.904 | 0.356    | 1.057 | 0.380    | 0.642 |
| 0.385    | 1.501 | 0.374    | 0.948 | 0.371    | 1.077 | 0.382    | 0.645 |
| 0.389    | 1.560 | 0.383    | 0.960 | 0.388    | 1.129 | 0.394    | 0.667 |
| 0.400    | 1.729 | 0.396    | 0.993 | 0.387    | 1.137 | 0.400    | 0.697 |
| 0.411    | 1.937 | 0.400    | 1.023 | 0.395    | 1.155 | 0.402    | 0.696 |
| 0.419    | 2.042 | 0.417    | 1.060 | 0.409    | 1.188 | 0.420    | 0.707 |

|         |       |         |       |         |       |         |       |
|---------|-------|---------|-------|---------|-------|---------|-------|
| 0.429   | 2.131 | 0.424   | 1.093 | 0.419   | 1.237 | 0.429   | 0.747 |
| 0.457   | 2.195 | 0.439   | 1.150 | 0.437   | 1.273 | 0.444   | 0.783 |
| 0.471   | 2.203 | 0.445   | 1.178 | 0.448   | 1.300 | 0.446   | 0.791 |
| 0.488   | 2.212 | 0.452   | 1.208 | 0.451   | 1.346 | 0.453   | 0.802 |
| 0.508   | 2.227 | 0.471   | 1.250 | 0.466   | 1.392 | 0.470   | 0.852 |
| 0.528   | 2.243 | 0.480   | 1.356 | 0.476   | 1.454 | 0.484   | 0.898 |
| 0.557   | 2.255 | 0.487   | 1.460 | 0.486   | 1.514 | 0.495   | 0.931 |
| 0.589   | 2.274 | 0.494   | 1.586 | 0.497   | 1.588 | 0.511   | 1.013 |
| 0.620   | 2.291 | 0.497   | 1.730 | 0.511   | 1.741 | 0.517   | 1.107 |
| 0.65398 | 2.312 | 0.50634 | 1.865 | 0.5194  | 1.997 | 0.52615 | 1.246 |
| 0.67798 | 2.331 | 0.51408 | 2.013 | 0.52111 | 2.059 | 0.53069 | 1.386 |
| 0.71583 | 2.375 | 0.51621 | 2.142 | 0.52835 | 2.212 | 0.5346  | 1.491 |
| 0.74701 | 2.49  | 0.52494 | 2.285 | 0.52956 | 2.41  | 0.53978 | 1.781 |
| 0.75773 | 2.685 | 0.53474 | 2.48  | 0.53794 | 2.761 | 0.54461 | 1.886 |
| 0.76952 | 2.897 | 0.54525 | 2.637 | 0.54085 | 2.914 | 0.54873 | 1.973 |
| --      |       | 0.54554 | 2.695 | 0.54333 | 3.05  | 0.55676 | 2.114 |
| --      |       | 0.56066 | 2.747 | 0.54852 | 3.272 | 0.5706  | 2.39  |
| --      |       | 0.58807 | 2.842 | 0.56365 | 3.359 | 0.5792  | 2.551 |
| --      |       | 0.59411 | 2.871 | 0.56613 | 3.404 | 0.5853  | 2.645 |
| --      |       | 0.61854 | 2.908 | 0.57558 | 3.459 | 0.59766 | 2.71  |
| --      |       | 0.62997 | 2.949 | 0.58843 | 3.519 | 0.6076  | 2.774 |
| --      |       | 0.65845 | 2.986 | 0.60817 | 3.578 | 0.61719 | 2.837 |
| --      |       | 0.66995 | 3.011 | 0.62259 | 3.64  | 0.64063 | 2.916 |
| --      |       | 0.68991 | 3.052 | 0.63821 | 3.695 | 0.65646 | 2.976 |
| --      |       | 0.72712 | 3.139 | 0.66619 | 3.77  | 0.67485 | 3.014 |
| --      |       | 0.736   | 3.16  | 0.67691 | 3.804 | 0.69289 | 3.049 |
| --      |       | 0.74857 | 3.226 | 0.6914  | 3.862 | 0.71668 | 3.123 |
| --      |       | 0.75752 | 3.305 | 0.70844 | 3.919 | 0.74005 | 3.191 |
| --      |       | 0.76206 | 3.351 | 0.73898 | 4.028 | 0.75489 | 3.288 |
| --      |       | --      |       | 0.75034 | 4.125 | 0.76114 | 3.324 |
| --      |       | --      |       | 0.7497  | 4.156 | 0.75979 | 3.341 |
| --      |       | --      |       | 0.75801 | 4.177 | 0.76852 | 3.36  |



**Table S4.** Experimentally measured values of pressure and mass during desorption of Hexane in MCM-41 at +60°C.

| 6 nm     |       | 8 nm     |       | 10 nm    |       | 12 nm    |       |
|----------|-------|----------|-------|----------|-------|----------|-------|
| Pressure | Mass  | Pressure | Mass  | Pressure | Mass  | Pressure | Mass  |
| bar      | g     | bar      | g     | bar      | g     | bar      | g     |
| 0.767    | 3.596 | 0.785    | 3.631 | 0.780    | 4.387 | 0.789    | 3.510 |
| 0.751    | 2.616 | 0.793    | 3.629 | 0.775    | 4.374 | 0.777    | 3.494 |
| 0.647    | 2.333 | 0.782    | 3.621 | 0.763    | 4.350 | 0.770    | 3.471 |
| 0.547    | 2.273 | 0.771    | 3.593 | 0.749    | 4.283 | 0.756    | 3.427 |
| 0.485    | 2.240 | 0.746    | 3.446 | 0.703    | 4.003 | 0.690    | 3.066 |
| 0.447    | 2.213 | 0.684    | 3.107 | 0.603    | 3.693 | 0.603    | 2.888 |
| 0.437    | 2.205 | 0.580    | 2.913 | 0.536    | 3.475 | 0.544    | 2.666 |
| 0.409    | 2.184 | 0.499    | 2.724 | 0.487    | 3.213 | 0.515    | 2.326 |
| 0.402    | 2.148 | 0.464    | 2.388 | 0.479    | 2.798 | 0.488    | 1.705 |
| 0.388    | 2.109 | 0.452    | 1.875 | 0.469    | 2.163 | 0.468    | 0.988 |
| 0.381    | 2.052 | 0.442    | 1.472 | 0.459    | 1.538 | 0.448    | 0.774 |
| 0.377    | 1.980 | 0.419    | 1.169 | 0.428    | 1.310 | 0.413    | 0.689 |
| 0.371    | 1.865 | 0.399    | 1.089 | 0.401    | 1.222 | 0.397    | 0.641 |
| 0.364    | 1.721 | 0.382    | 1.032 | 0.382    | 1.157 | 0.385    | 0.603 |
| 0.360    | 1.519 | 0.380    | 1.023 | 0.372    | 1.126 | 0.380    | 0.576 |
| 0.349    | 1.318 | 0.373    | 1.007 | 0.359    | 1.096 | 0.361    | 0.560 |
| 0.349    | 1.230 | 0.364    | 0.978 | 0.355    | 1.066 | 0.358    | 0.543 |
| 0.341    | 1.191 | 0.356    | 0.959 | 0.345    | 1.029 | 0.353    | 0.529 |
| 0.344    | 1.175 | 0.347    | 0.940 | 0.340    | 0.999 | 0.342    | 0.510 |
| 0.342    | 1.164 | 0.343    | 0.912 | 0.337    | 0.985 | 0.339    | 0.497 |
| 0.324    | 1.122 | 0.333    | 0.891 | 0.334    | 0.957 | 0.334    | 0.464 |
| 0.320    | 1.113 | 0.325    | 0.874 | 0.319    | 0.932 | 0.327    | 0.441 |
| 0.316    | 1.093 | 0.321    | 0.859 | 0.318    | 0.916 | 0.314    | 0.426 |
| 0.303    | 1.082 | 0.322    | 0.839 | 0.314    | 0.904 | 0.311    | 0.423 |
| 0.300    | 1.062 | 0.316    | 0.823 | 0.307    | 0.885 | 0.307    | 0.421 |
| 0.298    | 1.061 | 0.314    | 0.808 | 0.293    | 0.861 | 0.301    | 0.422 |
| 0.295    | 1.051 | 0.309    | 0.795 | 0.281    | 0.840 | 0.302    | 0.411 |
| 0.294    | 1.046 | 0.307    | 0.791 | 0.279    | 0.822 | 0.297    | 0.402 |
| 0.287    | 1.033 | 0.305    | 0.781 | 0.268    | 0.802 | 0.290    | 0.394 |
| 0.270    | 1.003 | 0.294    | 0.769 | 0.260    | 0.776 | 0.282    | 0.385 |
| 0.258    | 0.965 | 0.289    | 0.748 | 0.250    | 0.768 | 0.276    | 0.369 |

|         |       |         |       |         |       |         |       |
|---------|-------|---------|-------|---------|-------|---------|-------|
| 0.245   | 0.936 | 0.285   | 0.741 | 0.247   | 0.760 | 0.269   | 0.365 |
| 0.230   | 0.908 | 0.272   | 0.720 | 0.248   | 0.754 | 0.265   | 0.347 |
| 0.223   | 0.895 | 0.263   | 0.705 | 0.243   | 0.741 | 0.254   | 0.334 |
| 0.219   | 0.886 | 0.254   | 0.686 | 0.232   | 0.725 | 0.247   | 0.326 |
| 0.218   | 0.875 | 0.237   | 0.661 | 0.228   | 0.710 | 0.244   | 0.303 |
| 0.217   | 0.868 | 0.232   | 0.640 | 0.222   | 0.699 | 0.239   | 0.292 |
| 0.216   | 0.863 | 0.226   | 0.627 | 0.220   | 0.689 | 0.228   | 0.286 |
| 0.212   | 0.867 | 0.222   | 0.614 | 0.218   | 0.684 | 0.220   | 0.273 |
| 0.214   | 0.864 | 0.215   | 0.603 | 0.209   | 0.676 | 0.219   | 0.279 |
| 0.20765 | 0.864 | 0.21219 | 0.601 | 0.21411 | 0.68  | 0.22008 | 0.27  |
| 0.20701 | 0.86  | 0.20971 | 0.595 | 0.21219 | 0.674 | 0.21965 | 0.265 |
| 0.21106 | 0.86  | 0.20729 | 0.591 | 0.21205 | 0.677 | 0.22043 | 0.269 |
| 0.21269 | 0.856 | 0.21006 | 0.593 | 0.21674 | 0.674 | 0.21617 | 0.267 |
| 0.20878 | 0.853 | 0.2117  | 0.596 | 0.21255 | 0.673 | 0.21127 | 0.265 |
| 0.21127 | 0.853 | 0.21489 | 0.595 | 0.21042 | 0.671 | 0.21333 | 0.259 |
| 0.21326 | 0.848 | 0.21518 | 0.595 | 0.2134  | 0.669 | 0.2085  | 0.26  |
| 0.20822 | 0.834 | 0.20864 | 0.596 | 0.21489 | 0.669 | 0.21276 | 0.251 |
| 0.20197 | 0.827 | 0.21475 | 0.594 | 0.21276 | 0.663 | 0.21283 | 0.259 |
| 0.20168 | 0.832 | 0.21219 | 0.592 | 0.21752 | 0.668 | 0.21006 | 0.262 |
| 0.20332 | 0.828 | 0.20722 | 0.589 | 0.21049 | 0.664 | 0.20651 | 0.252 |
| 0.19991 | 0.829 | 0.21106 | 0.59  | 0.21333 | 0.657 | 0.209   | 0.248 |
| 0.20033 | 0.829 | 0.21084 | 0.59  | 0.21006 | 0.652 | 0.20026 | 0.242 |
| 0.19536 | 0.824 | 0.20523 | 0.58  | 0.209   | 0.644 | 0.19543 | 0.231 |
| 0.19842 | 0.825 | 0.20225 | 0.575 | 0.20083 | 0.637 | 0.19501 | 0.214 |
| 0.19486 | 0.824 | 0.20104 | 0.571 | 0.19621 | 0.64  | 0.19799 | 0.224 |
| 0.19813 | 0.826 | 0.20097 | 0.57  | 0.19494 | 0.638 | 0.19884 | 0.231 |
| 0.1933  | 0.818 | 0.196   | 0.569 | 0.19721 | 0.637 | 0.19366 | 0.221 |
| 0.19273 | 0.817 | 0.19984 | 0.568 | 0.19529 | 0.634 | 0.1872  | 0.229 |
| 0.19998 | 0.813 | 0.18996 | 0.563 | 0.19834 | 0.635 | 0.19636 | 0.226 |
| 0.19153 | 0.823 | 0.19401 | 0.562 | 0.19643 | 0.631 | 0.19167 | 0.228 |
| 0.1894  | 0.822 | 0.18911 | 0.556 | 0.18854 | 0.625 | 0.19018 | 0.224 |
| 0.19252 | 0.823 | 0.19344 | 0.557 | 0.19778 | 0.623 | 0.18854 | 0.219 |
| 0.19444 | 0.817 | 0.18776 | 0.554 | 0.18982 | 0.628 | 0.18769 | 0.213 |
| 0.19096 | 0.815 | 0.18854 | 0.553 | 0.19025 | 0.625 | 0.18847 | 0.219 |
| 0.19153 | 0.817 | 0.18918 | 0.552 | 0.18812 | 0.62  | 0.1845  | 0.215 |

|         |       |         |       |         |       |         |       |
|---------|-------|---------|-------|---------|-------|---------|-------|
| 0.19728 | 0.817 | 0.18883 | 0.554 | 0.19217 | 0.622 | 0.18869 | 0.223 |
| 0.19032 | 0.817 | 0.18769 | 0.555 | 0.19018 | 0.623 | 0.19458 | 0.211 |
| 0.19408 | 0.822 | 0.18869 | 0.551 | 0.18698 | 0.624 | 0.18883 | 0.22  |
| 0.19458 | 0.815 | 0.18606 | 0.551 | 0.19131 | 0.623 | 0.19067 | 0.215 |
| 0.19593 | 0.811 | 0.18528 | 0.548 | 0.18847 | 0.618 | 0.18577 | 0.21  |
| 0.1982  | 0.815 | 0.18748 | 0.548 | 0.18414 | 0.616 | 0.19266 | 0.202 |
| 0.19515 | 0.815 | 0.19153 | 0.547 | 0.18996 | 0.618 | 0.19053 | 0.21  |
| 0.1921  | 0.815 | 0.18783 | 0.547 | 0.18386 | 0.618 | 0.19039 | 0.214 |
| 0.19337 | 0.818 | 0.18826 | 0.546 | 0.18222 | 0.617 | 0.19316 | 0.212 |
| 0.19479 | 0.813 | 0.18521 | 0.544 | 0.18549 | 0.615 | 0.19153 | 0.216 |
| 0.1943  | 0.818 | 0.17938 | 0.542 | 0.18372 | 0.619 | 0.1921  | 0.211 |
| 0.18847 | 0.812 | 0.18357 | 0.541 | 0.19075 | 0.617 | 0.19408 | 0.212 |
| 0.18996 | 0.81  | 0.18656 | 0.542 | 0.19032 | 0.617 | 0.19153 | 0.213 |
| 0.18634 | 0.804 | 0.1845  | 0.542 | 0.18471 | 0.616 | 0.18975 | 0.208 |
| 0.18954 | 0.804 | 0.18563 | 0.543 | 0.18826 | 0.615 | 0.19245 | 0.205 |
| 0.18102 | 0.793 | 0.18329 | 0.544 | 0.1867  | 0.617 | 0.19174 | 0.205 |
| 0.1796  | 0.785 | 0.18577 | 0.547 | 0.19146 | 0.614 | 0.19238 | 0.213 |
| 0.17782 | 0.774 | 0.18613 | 0.54  | 0.18904 | 0.62  | 0.19096 | 0.217 |
| 0.17789 | 0.773 | 0.18144 | 0.543 | 0.18791 | 0.615 | 0.18755 | 0.204 |
| 0.16504 | 0.758 | 0.18627 | 0.538 | 0.18876 | 0.613 | 0.18762 | 0.197 |
| 0.16262 | 0.75  | 0.18329 | 0.541 | 0.18847 | 0.612 | 0.18918 | 0.194 |
| 0.16234 | 0.745 | 0.184   | 0.538 | 0.18592 | 0.612 | 0.18741 | 0.199 |
| 0.15687 | 0.73  | 0.19025 | 0.539 | 0.18258 | 0.612 | 0.18535 | 0.192 |
| 0.15069 | 0.728 | 0.18627 | 0.544 | 0.18414 | 0.614 | 0.18649 | 0.192 |
| 0.15332 | 0.717 | 0.18663 | 0.54  | 0.18982 | 0.602 | 0.18024 | 0.188 |
| 0.14558 | 0.711 | 0.18471 | 0.539 | 0.18656 | 0.613 | 0.18485 | 0.194 |
| 0.1443  | 0.699 | 0.18244 | 0.538 | 0.18975 | 0.608 | 0.18002 | 0.185 |
| 0.14011 | 0.694 | 0.18151 | 0.53  | 0.18585 | 0.608 | 0.17186 | 0.168 |
| 0.14068 | 0.68  | 0.17732 | 0.52  | 0.18457 | 0.609 | 0.16674 | 0.156 |
| 0.13656 | 0.679 | 0.17086 | 0.513 | 0.18258 | 0.605 | 0.15794 | 0.153 |
| 0.1306  | 0.675 | 0.16667 | 0.503 | 0.17725 | 0.608 | 0.15332 | 0.144 |
| 0.12882 | 0.666 | 0.16099 | 0.495 | 0.18421 | 0.607 | 0.15275 | 0.137 |
| 0.12548 | 0.66  | 0.15879 | 0.485 | 0.18166 | 0.604 | 0.14274 | 0.119 |
| 0.12016 | 0.653 | 0.1541  | 0.479 | 0.1769  | 0.607 | 0.1394  | 0.121 |
| 0.12179 | 0.652 | 0.15247 | 0.471 | 0.17455 | 0.602 | 0.13244 | 0.105 |

|         |       |         |       |         |       |         |       |
|---------|-------|---------|-------|---------|-------|---------|-------|
| 0.12037 | 0.643 | 0.14622 | 0.462 | 0.1661  | 0.586 | 0.13017 | 0.104 |
| 0.11362 | 0.635 | 0.14558 | 0.458 | 0.16674 | 0.577 | 0.12101 | 0.092 |
| 0.11675 | 0.628 | 0.13805 | 0.448 | 0.16071 | 0.572 | 0.11185 | 0.089 |
| 0.1149  | 0.621 | 0.13926 | 0.445 | 0.15467 | 0.558 | 0.11107 | 0.081 |
| 0.11121 | 0.621 | 0.13408 | 0.437 | 0.15297 | 0.548 | 0.11128 | 0.074 |
| 0.1159  | 0.612 | 0.12946 | 0.43  | 0.14736 | 0.538 | 0.10752 | 0.074 |
| 0.11362 | 0.609 | 0.12634 | 0.426 | 0.14565 | 0.526 | 0.1083  | 0.064 |
| 0.10311 | 0.601 | 0.12328 | 0.42  | 0.13883 | 0.519 | 0.10212 | 0.061 |
| 0.10553 | 0.601 | 0.12073 | 0.412 | 0.14054 | 0.508 | 0.09708 | 0.049 |
| 0.10567 | 0.592 | 0.12186 | 0.403 | 0.13628 | 0.501 | 0.09892 | 0.053 |
| 0.10311 | 0.588 | 0.1225  | 0.4   | 0.12854 | 0.492 | 0.0948  | 0.048 |
| 0.1012  | 0.581 | 0.11838 | 0.393 | 0.12051 | 0.481 | 0.08863 | 0.036 |
| 0.0975  | 0.582 | 0.11256 | 0.391 | 0.11739 | 0.478 | 0.08706 | 0.034 |
| 0.09935 | 0.578 | 0.10787 | 0.386 | 0.11071 | 0.469 | 0.08486 | 0.038 |
| 0.09289 | 0.569 | 0.10574 | 0.381 | 0.11242 | 0.46  | 0.08387 | 0.027 |
| 0.0931  | 0.566 | 0.10666 | 0.374 | 0.11114 | 0.459 | 0.07769 | 0.024 |
| 0.0931  | 0.563 | 0.10425 | 0.373 | 0.10979 | 0.446 | 0.07797 | 0.01  |
| 0.09168 | 0.556 | 0.10155 | 0.364 | 0.11121 | 0.441 | 0.07371 | 0.023 |
| 0.09615 | 0.549 | 0.09907 | 0.365 | 0.10595 | 0.434 | 0.07528 | 0.014 |
| 0.08898 | 0.547 | 0.09594 | 0.361 | 0.10425 | 0.43  | 0.0718  | 0.015 |
| 0.09253 | 0.543 | 0.0963  | 0.355 | 0.09552 | 0.427 | 0.06974 | 0.006 |
| --      |       | 0.09168 | 0.35  | 0.09431 | 0.416 | 0.07158 | 0.004 |

**Table S5.** Experimentally measured values of pressure and mass during adsorption of Hexane in MCM-41 at +70°C.

| 6 nm     |       | 8 nm     |       | 10 nm    |       | 12 nm    |       |
|----------|-------|----------|-------|----------|-------|----------|-------|
| Pressure | Mass  | Pressure | Mass  | Pressure | Mass  | Pressure | Mass  |
| bar      | g     | bar      | g     | bar      | g     | bar      | g     |
| 0.000    | 0.000 | 0.000    | 0.000 | 0.000    | 0.000 | 0.000    | 0.000 |
| 0.056    | 0.399 | 0.181    | 0.392 | 0.181    | 0.431 | 0.181    | 0.256 |
| 0.184    | 0.679 | 0.195    | 0.401 | 0.187    | 0.443 | 0.188    | 0.260 |
| 0.190    | 0.687 | 0.198    | 0.415 | 0.202    | 0.463 | 0.191    | 0.261 |
| 0.196    | 0.700 | 0.206    | 0.439 | 0.213    | 0.493 | 0.205    | 0.292 |
| 0.203    | 0.711 | 0.202    | 0.447 | 0.220    | 0.510 | 0.213    | 0.291 |
| 0.211    | 0.722 | 0.219    | 0.467 | 0.229    | 0.524 | 0.223    | 0.299 |
| 0.215    | 0.742 | 0.225    | 0.476 | 0.244    | 0.542 | 0.226    | 0.307 |
| 0.246    | 0.801 | 0.232    | 0.493 | 0.252    | 0.570 | 0.248    | 0.338 |
| 0.263    | 0.822 | 0.241    | 0.500 | 0.256    | 0.581 | 0.254    | 0.343 |
| 0.274    | 0.846 | 0.251    | 0.517 | 0.261    | 0.589 | 0.264    | 0.348 |
| 0.282    | 0.865 | 0.260    | 0.530 | 0.269    | 0.617 | 0.271    | 0.366 |
| 0.289    | 0.877 | 0.266    | 0.540 | 0.282    | 0.621 | 0.284    | 0.371 |
| 0.293    | 0.887 | 0.273    | 0.553 | 0.288    | 0.633 | 0.293    | 0.385 |
| 0.301    | 0.896 | 0.281    | 0.551 | 0.300    | 0.656 | 0.302    | 0.380 |
| 0.306    | 0.898 | 0.285    | 0.566 | 0.305    | 0.654 | 0.311    | 0.387 |
| 0.312    | 0.904 | 0.289    | 0.575 | 0.312    | 0.671 | 0.318    | 0.396 |
| 0.315    | 0.915 | 0.291    | 0.582 | 0.319    | 0.686 | 0.331    | 0.400 |
| 0.329    | 0.931 | 0.299    | 0.596 | 0.328    | 0.702 | 0.338    | 0.416 |
| 0.337    | 0.947 | 0.307    | 0.610 | 0.333    | 0.714 | 0.344    | 0.416 |
| 0.349    | 0.976 | 0.324    | 0.638 | 0.336    | 0.728 | 0.353    | 0.432 |
| 0.368    | 0.997 | 0.331    | 0.659 | 0.349    | 0.737 | 0.360    | 0.439 |
| 0.384    | 1.027 | 0.350    | 0.683 | 0.356    | 0.752 | 0.367    | 0.457 |
| 0.401    | 1.061 | 0.358    | 0.696 | 0.364    | 0.778 | 0.374    | 0.466 |
| 0.418    | 1.090 | 0.373    | 0.716 | 0.371    | 0.791 | 0.387    | 0.482 |
| 0.437    | 1.126 | 0.386    | 0.745 | 0.384    | 0.812 | 0.393    | 0.490 |
| 0.455    | 1.156 | 0.397    | 0.752 | 0.389    | 0.824 | 0.412    | 0.522 |
| 0.471    | 1.199 | 0.399    | 0.761 | 0.403    | 0.851 | 0.416    | 0.513 |
| 0.491    | 1.250 | 0.414    | 0.784 | 0.411    | 0.869 | 0.425    | 0.527 |
| 0.506    | 1.321 | 0.424    | 0.800 | 0.425    | 0.883 | 0.445    | 0.554 |
| 0.520    | 1.411 | 0.436    | 0.827 | 0.434    | 0.902 | 0.456    | 0.559 |

|         |       |         |       |         |       |         |       |
|---------|-------|---------|-------|---------|-------|---------|-------|
| 0.539   | 1.578 | 0.449   | 0.840 | 0.441   | 0.923 | 0.462   | 0.574 |
| 0.549   | 1.687 | 0.461   | 0.859 | 0.451   | 0.943 | 0.482   | 0.618 |
| 0.560   | 1.809 | 0.472   | 0.876 | 0.462   | 0.971 | 0.491   | 0.633 |
| 0.571   | 1.852 | 0.480   | 0.903 | 0.479   | 0.992 | 0.500   | 0.642 |
| 0.571   | 1.913 | 0.495   | 0.924 | 0.489   | 1.018 | 0.522   | 0.664 |
| 0.588   | 2.043 | 0.510   | 0.951 | 0.502   | 1.039 | 0.538   | 0.678 |
| 0.600   | 2.108 | 0.531   | 0.984 | 0.517   | 1.071 | 0.562   | 0.714 |
| 0.618   | 2.169 | 0.540   | 1.006 | 0.533   | 1.103 | 0.570   | 0.732 |
| 0.644   | 2.196 | 0.561   | 1.041 | 0.549   | 1.135 | 0.578   | 0.741 |
| 0.68188 | 2.215 | 0.57565 | 1.07  | 0.5645  | 1.165 | 0.59503 | 0.771 |
| 0.71789 | 2.233 | 0.59766 | 1.117 | 0.57799 | 1.202 | 0.63004 | 0.815 |
| 0.75666 | 2.252 | 0.61549 | 1.153 | 0.59312 | 1.243 | 0.64155 | 0.844 |
| 0.81063 | 2.278 | 0.63736 | 1.205 | 0.60874 | 1.289 | 0.66633 | 0.886 |
| 0.86056 | 2.298 | 0.65902 | 1.276 | 0.62195 | 1.336 | 0.68693 | 0.938 |
| 0.90821 | 2.326 | 0.6762  | 1.332 | 0.65277 | 1.38  | 0.70489 | 1.008 |
| 0.97589 | 2.367 | 0.69105 | 1.46  | 0.66157 | 1.43  | 0.7267  | 1.074 |
| 1.02964 | 2.456 | 0.69488 | 1.581 | 0.68451 | 1.485 | 0.74892 | 1.184 |
| 1.05805 | 2.65  | 0.70347 | 1.702 | 0.70184 | 1.552 | 0.75567 | 1.289 |
| --      |       | 0.7137  | 1.862 | 0.72101 | 1.627 | 0.76788 | 1.566 |
| --      |       | 0.71846 | 2.027 | 0.73415 | 1.727 | 0.77271 | 1.749 |
| --      |       | 0.72762 | 2.168 | 0.73401 | 1.869 | 0.78557 | 1.913 |
| --      |       | 0.73628 | 2.301 | 0.73898 | 2.027 | 0.7894  | 2.066 |
| --      |       | 0.74772 | 2.46  | 0.74544 | 2.199 | 0.79345 | 2.219 |
| --      |       | 0.75659 | 2.576 | 0.74289 | 2.353 | 0.80687 | 2.368 |
| --      |       | 0.77037 | 2.702 | 0.74921 | 2.497 | 0.81674 | 2.508 |
| --      |       | 0.79899 | 2.794 | 0.7546  | 2.649 | 0.85367 | 2.752 |
| --      |       | 0.83769 | 2.87  | 0.75993 | 2.795 | 0.87426 | 2.85  |
| --      |       | 0.87817 | 2.933 | 0.76682 | 2.935 | 0.91503 | 2.944 |
| --      |       | 0.92184 | 2.997 | 0.77044 | 3.066 | 0.95188 | 3.03  |
| --      |       | 0.95792 | 3.052 | 0.78123 | 3.202 | 0.99066 | 3.106 |
| --      |       | 0.99258 | 3.105 | 0.79537 | 3.321 | 1.02588 | 3.183 |
| --      |       | 1.01977 | 3.171 | 0.81433 | 3.416 | 1.05074 | 3.289 |
| --      |       | 1.04172 | 3.266 | 0.83229 | 3.495 | 1.0709  | 3.462 |
| --      |       | 1.06629 | 3.451 | 0.86404 | 3.577 | --      |       |
| --      |       | 1.06813 | 3.493 | 0.89351 | 3.652 | --      |       |

|    |  |         |       |         |       |    |  |
|----|--|---------|-------|---------|-------|----|--|
| -- |  | 1.08752 | 3.669 | 0.93576 | 3.753 | -- |  |
| -- |  | 1.09896 | 3.848 | 0.9793  | 3.83  | -- |  |
| -- |  | 1.10442 | 3.868 | 1.00167 | 3.894 | -- |  |
| -- |  | --      |       | 1.02318 | 3.97  | -- |  |
| -- |  | --      |       | 1.04363 | 4.063 | -- |  |
| -- |  | --      |       | 1.05258 | 4.137 | -- |  |
| -- |  | --      |       | 1.0616  | 4.227 | -- |  |
| -- |  | --      |       | 1.06643 | 4.268 | -- |  |
| -- |  | --      |       | 1.07154 | 4.298 | -- |  |

**Table S6.** Experimentally measured values of pressure and mass during desorption of Hexane in MCM-41 at +70°C.

| 6 nm     |       | 8 nm     |       | 10 nm    |       | 12 nm    |       |
|----------|-------|----------|-------|----------|-------|----------|-------|
| Pressure | Mass  | Pressure | Mass  | Pressure | Mass  | Pressure | Mass  |
| bar      | g     | bar      | g     | bar      | g     | bar      | g     |
| 1.061    | 3.202 | 1.048    | 3.708 | 1.053    | 4.714 | 1.049    | 4.256 |
| 1.023    | 2.553 | 0.981    | 3.175 | 1.010    | 4.094 | 1.046    | 3.430 |
| 0.890    | 2.333 | 0.835    | 2.944 | 0.867    | 3.714 | 0.906    | 2.985 |
| 0.892    | 2.342 | 0.717    | 2.728 | 0.759    | 3.434 | 0.808    | 2.776 |
| 0.883    | 2.336 | 0.669    | 2.339 | 0.700    | 3.110 | 0.743    | 2.389 |
| 0.878    | 2.331 | 0.660    | 1.969 | 0.682    | 2.560 | 0.721    | 1.859 |
| 0.878    | 2.331 | 0.645    | 1.642 | 0.674    | 1.980 | 0.703    | 1.396 |
| 0.878    | 2.334 | 0.627    | 1.327 | 0.657    | 1.489 | 0.682    | 0.991 |
| 0.879    | 2.333 | 0.578    | 1.149 | 0.590    | 1.288 | 0.625    | 0.795 |
| 0.878    | 2.334 | 0.578    | 1.152 | 0.532    | 1.155 | 0.580    | 0.724 |
| 0.882    | 2.338 | 0.576    | 1.153 | 0.511    | 1.090 | 0.553    | 0.683 |
| 0.883    | 2.333 | 0.582    | 1.161 | 0.484    | 1.041 | 0.527    | 0.640 |
| 0.891    | 2.341 | 0.589    | 1.165 | 0.463    | 1.001 | 0.511    | 0.609 |
| 0.900    | 2.342 | 0.590    | 1.167 | 0.455    | 0.977 | 0.497    | 0.586 |
| 0.897    | 2.338 | 0.589    | 1.172 | 0.460    | 0.977 | 0.485    | 0.571 |
| 0.888    | 2.336 | 0.592    | 1.173 | 0.452    | 0.969 | 0.478    | 0.556 |
| 0.844    | 2.320 | 0.592    | 1.177 | 0.445    | 0.947 | 0.460    | 0.542 |
| 0.799    | 2.294 | 0.592    | 1.180 | 0.435    | 0.930 | 0.450    | 0.522 |
| 0.755    | 2.272 | 0.589    | 1.183 | 0.426    | 0.918 | 0.443    | 0.511 |
| 0.713    | 2.257 | 0.594    | 1.182 | 0.421    | 0.909 | 0.436    | 0.511 |
| 0.693    | 2.244 | 0.594    | 1.180 | 0.412    | 0.898 | 0.429    | 0.489 |
| 0.654    | 2.230 | 0.593    | 1.181 | 0.406    | 0.880 | 0.417    | 0.483 |
| 0.635    | 2.217 | 0.576    | 1.149 | 0.401    | 0.863 | 0.409    | 0.465 |
| 0.611    | 2.210 | 0.555    | 1.099 | 0.388    | 0.847 | 0.407    | 0.460 |
| 0.596    | 2.194 | 0.536    | 1.052 | 0.384    | 0.836 | 0.387    | 0.447 |
| 0.583    | 2.178 | 0.514    | 1.016 | 0.374    | 0.822 | 0.380    | 0.428 |
| 0.572    | 2.156 | 0.497    | 0.981 | 0.364    | 0.812 | 0.370    | 0.423 |
| 0.558    | 2.121 | 0.482    | 0.956 | 0.359    | 0.800 | 0.367    | 0.413 |
| 0.550    | 2.084 | 0.464    | 0.926 | 0.352    | 0.793 | 0.361    | 0.396 |
| 0.543    | 2.037 | 0.458    | 0.907 | 0.347    | 0.784 | 0.357    | 0.385 |
| 0.539    | 1.928 | 0.448    | 0.891 | 0.342    | 0.756 | 0.356    | 0.380 |



|         |       |         |       |         |       |         |       |
|---------|-------|---------|-------|---------|-------|---------|-------|
| 0.529   | 1.791 | 0.433   | 0.873 | 0.341   | 0.747 | 0.352   | 0.378 |
| 0.528   | 1.644 | 0.425   | 0.854 | 0.336   | 0.737 | 0.343   | 0.378 |
| 0.516   | 1.476 | 0.417   | 0.839 | 0.331   | 0.721 | 0.343   | 0.370 |
| 0.508   | 1.364 | 0.406   | 0.826 | 0.326   | 0.715 | 0.338   | 0.365 |
| 0.495   | 1.310 | 0.403   | 0.813 | 0.325   | 0.708 | 0.332   | 0.359 |
| 0.492   | 1.274 | 0.392   | 0.799 | 0.318   | 0.700 | 0.326   | 0.351 |
| 0.485   | 1.243 | 0.389   | 0.789 | 0.315   | 0.692 | 0.324   | 0.339 |
| 0.470   | 1.221 | 0.383   | 0.778 | 0.296   | 0.669 | 0.314   | 0.336 |
| 0.467   | 1.207 | 0.373   | 0.768 | 0.288   | 0.646 | 0.304   | 0.322 |
| 0.46288 | 1.193 | 0.3707  | 0.759 | 0.26659 | 0.62  | 0.29542 | 0.311 |
| 0.45513 | 1.175 | 0.36757 | 0.755 | 0.2597  | 0.603 | 0.28491 | 0.295 |
| 0.45009 | 1.155 | 0.35912 | 0.746 | 0.24791 | 0.582 | 0.27348 | 0.281 |
| 0.44335 | 1.144 | 0.35586 | 0.739 | 0.24287 | 0.572 | 0.26432 | 0.271 |
| 0.43766 | 1.128 | 0.34755 | 0.731 | 0.2347  | 0.563 | 0.25999 | 0.276 |
| 0.42992 | 1.112 | 0.34116 | 0.727 | 0.2325  | 0.56  | 0.25303 | 0.271 |
| 0.41991 | 1.102 | 0.33789 | 0.721 | 0.2281  | 0.55  | 0.24287 | 0.257 |
| 0.41551 | 1.093 | 0.33292 | 0.715 | 0.22419 | 0.546 | 0.23456 | 0.256 |
| 0.417   | 1.082 | 0.33576 | 0.711 | 0.21723 | 0.542 | 0.23399 | 0.245 |
| 0.40443 | 1.071 | 0.33192 | 0.703 | 0.22093 | 0.535 | 0.2249  | 0.242 |
| 0.4104  | 1.065 | 0.33136 | 0.7   | 0.21681 | 0.534 | 0.23037 | 0.247 |
| 0.40187 | 1.058 | 0.32823 | 0.688 | 0.21496 | 0.53  | 0.22789 | 0.228 |
| 0.39527 | 1.049 | 0.32816 | 0.685 | 0.21312 | 0.527 | 0.22597 | 0.232 |
| 0.38973 | 1.042 | 0.32482 | 0.676 | 0.21297 | 0.523 | 0.21432 | 0.224 |
| 0.3898  | 1.036 | 0.31602 | 0.665 | 0.20509 | 0.523 | 0.21638 | 0.223 |
| 0.38043 | 1.026 | 0.32404 | 0.659 | 0.20623 | 0.519 | 0.21184 | 0.209 |
| 0.37531 | 1.021 | 0.31978 | 0.658 | 0.20999 | 0.52  | 0.21794 | 0.225 |
| 0.37155 | 1.01  | 0.32113 | 0.657 | 0.20658 | 0.515 | 0.21319 | 0.218 |
| 0.36445 | 1.002 | 0.31815 | 0.657 | 0.20261 | 0.515 | 0.21503 | 0.214 |
| 0.36715 | 0.999 | 0.31921 | 0.657 | 0.20694 | 0.52  | 0.2117  | 0.208 |
| 0.3626  | 0.992 | 0.31509 | 0.654 | 0.20672 | 0.511 | 0.2102  | 0.204 |
| 0.35863 | 0.986 | 0.31488 | 0.65  | 0.20559 | 0.511 | 0.21269 | 0.215 |
| 0.35458 | 0.978 | 0.31005 | 0.65  | 0.20616 | 0.515 | 0.21454 | 0.215 |
| 0.34918 | 0.974 | 0.30998 | 0.646 | 0.20985 | 0.512 | 0.21383 | 0.216 |
| 0.35273 | 0.972 | 0.30984 | 0.641 | 0.20197 | 0.51  | 0.20786 | 0.208 |
| 0.34762 | 0.96  | 0.30707 | 0.635 | 0.19792 | 0.511 | 0.20807 | 0.209 |

|         |       |         |       |         |       |         |       |
|---------|-------|---------|-------|---------|-------|---------|-------|
| 0.34868 | 0.956 | 0.29492 | 0.624 | 0.19735 | 0.513 | 0.20857 | 0.21  |
| 0.35181 | 0.956 | 0.28747 | 0.611 | 0.19643 | 0.504 | 0.20104 | 0.2   |
| 0.34037 | 0.953 | 0.27618 | 0.592 | 0.19778 | 0.502 | 0.19998 | 0.198 |
| 0.34087 | 0.95  | 0.26964 | 0.583 | 0.19792 | 0.5   | 0.19692 | 0.196 |
| 0.34371 | 0.944 | 0.2592  | 0.568 | 0.19522 | 0.499 | 0.19543 | 0.198 |
| 0.33974 | 0.934 | 0.24671 | 0.556 | 0.19337 | 0.501 | 0.19692 | 0.196 |
| 0.33555 | 0.927 | 0.24365 | 0.548 | 0.19146 | 0.501 | 0.19579 | 0.188 |
| 0.33121 | 0.922 | 0.23165 | 0.542 | 0.19366 | 0.501 | 0.19657 | 0.199 |
| 0.32553 | 0.91  | 0.23158 | 0.534 | 0.19629 | 0.499 | 0.19515 | 0.194 |
| 0.30955 | 0.902 | 0.22668 | 0.526 | 0.19565 | 0.498 | 0.19202 | 0.192 |
| 0.29514 | 0.864 | 0.22213 | 0.519 | 0.19273 | 0.5   | 0.18897 | 0.192 |
| 0.26915 | 0.831 | 0.22036 | 0.512 | 0.19657 | 0.496 | 0.18521 | 0.197 |
| 0.25658 | 0.804 | 0.2139  | 0.509 | 0.19238 | 0.497 | 0.18947 | 0.193 |
| 0.23825 | 0.783 | 0.21617 | 0.503 | 0.19075 | 0.499 | 0.18577 | 0.186 |
| 0.22533 | 0.76  | 0.21198 | 0.499 | 0.19486 | 0.496 | 0.18478 | 0.183 |
| 0.22071 | 0.746 | 0.20935 | 0.496 | 0.19238 | 0.489 | 0.18038 | 0.19  |
| 0.21333 | 0.74  | 0.21148 | 0.494 | 0.19167 | 0.488 | 0.18393 | 0.181 |
| 0.20722 | 0.729 | 0.20687 | 0.494 | 0.19032 | 0.489 | 0.18649 | 0.185 |
| 0.20857 | 0.727 | 0.20268 | 0.492 | 0.1894  | 0.489 | 0.18663 | 0.178 |
| 0.20687 | 0.735 | 0.20566 | 0.497 | 0.18791 | 0.488 | 0.18854 | 0.181 |
| 0.20566 | 0.731 | 0.20743 | 0.492 | 0.18421 | 0.485 | 0.18712 | 0.182 |
| 0.19934 | 0.726 | 0.20637 | 0.496 | 0.18478 | 0.484 | 0.18741 | 0.187 |
| 0.19636 | 0.721 | 0.2085  | 0.489 | 0.18833 | 0.484 | 0.18691 | 0.181 |
| 0.19991 | 0.721 | 0.2058  | 0.489 | 0.18407 | 0.483 | 0.17782 | 0.186 |
| 0.20282 | 0.724 | 0.20715 | 0.493 | 0.18549 | 0.488 | 0.17903 | 0.194 |
| 0.19877 | 0.728 | 0.20197 | 0.495 | 0.19146 | 0.486 | 0.18485 | 0.19  |
| 0.19714 | 0.724 | 0.20353 | 0.492 | 0.19096 | 0.484 | 0.18982 | 0.192 |
| 0.20019 | 0.722 | 0.20545 | 0.49  | 0.18869 | 0.485 | 0.19139 | 0.194 |
| 0.19991 | 0.725 | 0.19969 | 0.486 | 0.19004 | 0.484 | 0.19082 | 0.192 |
| 0.20424 | 0.727 | 0.19756 | 0.483 | 0.1894  | 0.491 | 0.19082 | 0.183 |
| 0.19806 | 0.721 | 0.2009  | 0.481 | 0.18833 | 0.488 | 0.1845  | 0.189 |
| 0.19991 | 0.72  | 0.19501 | 0.479 | 0.18933 | 0.488 | 0.1889  | 0.187 |
| 0.19948 | 0.723 | 0.19778 | 0.481 | 0.1872  | 0.487 | 0.19096 | 0.182 |
| 0.1933  | 0.715 | 0.19934 | 0.477 | 0.18705 | 0.483 | 0.19174 | 0.186 |
| 0.1894  | 0.704 | 0.1987  | 0.479 | 0.18649 | 0.488 | 0.18869 | 0.188 |

|         |       |         |       |         |       |         |       |
|---------|-------|---------|-------|---------|-------|---------|-------|
| 0.1884  | 0.691 | 0.19898 | 0.479 | 0.18663 | 0.489 | 0.1872  | 0.189 |
| 0.18379 | 0.687 | 0.196   | 0.48  | 0.19011 | 0.488 | 0.18826 | 0.182 |
| 0.18215 | 0.675 | 0.19451 | 0.481 | 0.18918 | 0.489 | 0.19082 | 0.185 |
| 0.18293 | 0.678 | 0.19763 | 0.485 | 0.18372 | 0.487 | 0.19309 | 0.193 |
| 0.17903 | 0.679 | 0.19394 | 0.48  | 0.18656 | 0.492 | 0.19359 | 0.192 |
| 0.18194 | 0.674 | 0.18925 | 0.473 | 0.18606 | 0.487 | 0.18989 | 0.19  |
| 0.18052 | 0.683 | 0.18954 | 0.472 | 0.1884  | 0.488 | 0.19025 | 0.191 |
| 0.17612 | 0.676 | 0.18755 | 0.467 | 0.18862 | 0.486 | 0.19053 | 0.192 |
| 0.17711 | 0.677 | 0.18712 | 0.466 | 0.18549 | 0.486 | 0.18869 | 0.179 |
| 0.18407 | 0.678 | 0.18812 | 0.463 | 0.18272 | 0.482 | 0.18585 | 0.178 |
| 0.17619 | 0.677 | 0.18833 | 0.465 | 0.17974 | 0.481 | 0.18769 | 0.176 |
| 0.17576 | 0.674 | 0.19117 | 0.464 | 0.17839 | 0.474 | 0.18698 | 0.169 |
| 0.17548 | 0.675 | 0.18769 | 0.465 | 0.17889 | 0.48  | 0.18421 | 0.183 |
| 0.1737  | 0.669 | 0.19124 | 0.464 | 0.17484 | 0.47  | 0.19011 | 0.17  |
| 0.17427 | 0.67  | 0.18911 | 0.463 | 0.17036 | 0.463 | 0.18791 | 0.174 |
| 0.17363 | 0.674 | 0.18386 | 0.465 | 0.16071 | 0.448 | 0.1862  | 0.174 |
| 0.17058 | 0.672 | 0.18421 | 0.464 | 0.15396 | 0.442 | 0.18748 | 0.176 |
| 0.17299 | 0.672 | 0.18521 | 0.459 | 0.15424 | 0.428 | 0.18563 | 0.171 |
| 0.16674 | 0.661 | 0.18613 | 0.46  | 0.14274 | 0.419 | 0.18606 | 0.174 |
| 0.15559 | 0.642 | 0.18592 | 0.461 | 0.13848 | 0.409 | 0.18783 | 0.171 |
| 0.14388 | 0.627 | 0.18854 | 0.46  | 0.13159 | 0.399 | 0.17974 | 0.164 |
| 0.14295 | 0.618 | 0.18549 | 0.461 | 0.13159 | 0.395 | 0.18741 | 0.166 |
| 0.12925 | 0.604 | 0.18301 | 0.457 | 0.12371 | 0.386 | 0.17803 | 0.163 |
| 0.12378 | 0.592 | 0.17136 | 0.442 | 0.12051 | 0.374 | 0.16688 | 0.146 |
| 0.123   | 0.579 | 0.16838 | 0.427 | 0.11362 | 0.357 | 0.15538 | 0.13  |
| 0.11313 | 0.569 | 0.15645 | 0.413 | 0.10943 | 0.351 | 0.14835 | 0.11  |
| 0.11788 | 0.557 | 0.14601 | 0.398 | 0.1073  | 0.345 | 0.13351 | 0.108 |
| 0.10695 | 0.549 | 0.13713 | 0.387 | 0.10091 | 0.338 | 0.12896 | 0.087 |
| 0.10198 | 0.543 | 0.13266 | 0.375 | 0.0963  | 0.327 | 0.12449 | 0.081 |
| 0.1002  | 0.528 | 0.12165 | 0.366 | 0.08919 | 0.32  | 0.11362 | 0.08  |
| 0.09672 | 0.521 | 0.11781 | 0.355 | 0.08756 | 0.313 | 0.10979 | 0.077 |
| 0.09253 | 0.514 | 0.11504 | 0.347 | 0.08564 | 0.303 | 0.10361 | 0.07  |
| 0.09623 | 0.509 | 0.11022 | 0.34  | 0.07989 | 0.302 | 0.10318 | 0.059 |
| 0.08699 | 0.499 | 0.10162 | 0.331 | 0.07812 | 0.291 | 0.09644 | 0.056 |
| 0.08515 | 0.489 | 0.10148 | 0.323 | 0.07719 | 0.287 | 0.09402 | 0.055 |

|         |       |         |       |         |       |         |       |
|---------|-------|---------|-------|---------|-------|---------|-------|
| 0.07783 | 0.484 | 0.09928 | 0.315 | 0.07038 | 0.282 | 0.09076 | 0.04  |
| 0.07634 | 0.477 | 0.09118 | 0.309 | 0.06228 | 0.275 | 0.09054 | 0.041 |
| 0.07868 | 0.473 | 0.09161 | 0.304 | 0.06654 | 0.272 | 0.08344 | 0.029 |
| 0.07542 | 0.464 | 0.08685 | 0.297 | 0.06711 | 0.266 | 0.07968 | 0.024 |
| 0.07123 | 0.458 | 0.08593 | 0.293 | 0.06406 | 0.265 | 0.07251 | 0.021 |
| 0.07201 | 0.452 | 0.0789  | 0.284 | 0.05894 | 0.257 | 0.07343 | 0.014 |
| 0.07364 | 0.447 | 0.07691 | 0.282 | 0.0556  | 0.248 | 0.06441 | 0.018 |
| 0.06718 | 0.446 | 0.07535 | 0.277 | 0.05702 | 0.247 | 0.06121 | 0.009 |
| 0.06498 | 0.441 | 0.07378 | 0.274 | 0.05901 | 0.247 |         |       |
| 0.06448 | 0.431 | 0.07187 | 0.272 | 0.0561  | 0.244 |         |       |
| 0.06264 | 0.431 | 0.06896 | 0.264 | 0.05312 | 0.237 |         |       |
| 0.05823 | 0.426 | 0.06683 | 0.259 | 0.04595 | 0.236 |         |       |
| 0.06086 | 0.42  | 0.06271 | 0.257 | 0.04914 | 0.23  |         |       |
| 0.05248 | 0.411 | 0.06192 | 0.254 | 0.04708 | 0.228 |         |       |
| 0.04801 | 0.411 | 0.0583  | 0.25  | 0.04701 | 0.224 |         |       |
| 0.04765 | 0.409 | 0.0637  | 0.245 | 0.04296 | 0.224 |         |       |
| 0.04836 | 0.406 | 0.05575 | 0.242 | 0.04176 | 0.221 |         |       |
| 0.0517  | 0.402 | 0.05624 | 0.239 | 0.03963 | 0.216 |         |       |
| 0.04786 | 0.397 | 0.0583  | 0.239 | 0.03849 | 0.216 |         |       |
| 0.05447 | 0.392 | 0.05624 | 0.236 | 0.03792 | 0.212 |         |       |
| 0.04808 | 0.39  | 0.05617 | 0.232 | 0.04041 | 0.21  |         |       |
| 0.04957 | 0.39  | 0.0522  | 0.227 | 0.0343  | 0.206 |         |       |
| 0.0458  | 0.38  | 0.05177 | 0.225 | 0.03629 | 0.205 |         |       |
| 0.04232 | 0.381 | 0.04936 | 0.224 | 0.03316 | 0.201 |         |       |
| 0.0441  | 0.376 | 0.04886 | 0.223 | 0.03636 | 0.201 |         |       |
| --      |       | 0.04843 | 0.221 | 0.02812 | 0.198 |         |       |
| --      |       | 0.04538 | 0.216 | 0.03153 | 0.2   |         |       |
| --      |       | 0.04879 | 0.217 | 0.02912 | 0.198 |         |       |
| --      |       | 0.04772 | 0.214 | 0.02684 | 0.194 |         |       |
| --      |       | 0.04659 | 0.212 | 0.02386 | 0.193 |         |       |
| --      |       | 0.04367 | 0.212 | 0.02649 | 0.189 |         |       |
| --      |       | --      |       | 0.02429 | 0.189 |         |       |

**Table S7.** Experimentally measured values of pressure and mass during adsorption of Hexane in MCM-41 at +80°C.

| 6 nm     |       | 8 nm     |       | 10 nm    |       | 12 nm    |       |
|----------|-------|----------|-------|----------|-------|----------|-------|
| Pressure | Mass  | Pressure | Mass  | Pressure | Mass  | Pressure | Mass  |
| bar      | g     | bar      | g     | bar      | g     | bar      | g     |
| 0.000    | 0.000 | 0.000    | 0.000 | 0.000    | 0.000 | 0.000    | 0.000 |
| 0.074    | 0.357 | 0.176    | 0.306 | 0.181    | 0.342 | 0.182    | 0.195 |
| 0.187    | 0.570 | 0.188    | 0.314 | 0.190    | 0.359 | 0.187    | 0.203 |
| 0.194    | 0.582 | 0.194    | 0.319 | 0.197    | 0.369 | 0.194    | 0.207 |
| 0.201    | 0.585 | 0.197    | 0.330 | 0.202    | 0.386 | 0.204    | 0.218 |
| 0.211    | 0.612 | 0.209    | 0.342 | 0.209    | 0.394 | 0.206    | 0.231 |
| 0.225    | 0.626 | 0.210    | 0.352 | 0.216    | 0.411 | 0.221    | 0.231 |
| 0.233    | 0.647 | 0.216    | 0.359 | 0.229    | 0.422 | 0.225    | 0.239 |
| 0.240    | 0.656 | 0.222    | 0.367 | 0.233    | 0.439 | 0.227    | 0.252 |
| 0.244    | 0.669 | 0.226    | 0.374 | 0.242    | 0.444 | 0.236    | 0.242 |
| 0.247    | 0.678 | 0.231    | 0.382 | 0.247    | 0.457 | 0.239    | 0.253 |
| 0.254    | 0.681 | 0.236    | 0.388 | 0.257    | 0.460 | 0.241    | 0.256 |
| 0.257    | 0.686 | 0.245    | 0.401 | 0.257    | 0.475 | 0.248    | 0.272 |
| 0.265    | 0.702 | 0.257    | 0.409 | 0.268    | 0.472 | 0.258    | 0.262 |
| 0.272    | 0.703 | 0.258    | 0.417 | 0.268    | 0.482 | 0.264    | 0.271 |
| 0.278    | 0.707 | 0.268    | 0.422 | 0.273    | 0.485 | 0.268    | 0.263 |
| 0.286    | 0.716 | 0.270    | 0.433 | 0.277    | 0.500 | 0.276    | 0.270 |
| 0.286    | 0.718 | 0.275    | 0.444 | 0.282    | 0.504 | 0.281    | 0.277 |
| 0.290    | 0.725 | 0.282    | 0.449 | 0.287    | 0.521 | 0.291    | 0.280 |
| 0.292    | 0.735 | 0.286    | 0.452 | 0.295    | 0.524 | 0.297    | 0.290 |
| 0.301    | 0.739 | 0.287    | 0.455 | 0.299    | 0.533 | 0.297    | 0.292 |
| 0.296    | 0.742 | 0.289    | 0.456 | 0.300    | 0.536 | 0.294    | 0.294 |
| 0.307    | 0.747 | 0.291    | 0.458 | 0.303    | 0.537 | 0.292    | 0.298 |
| 0.310    | 0.750 | 0.290    | 0.460 | 0.303    | 0.537 | 0.292    | 0.296 |
| 0.539    | 1.041 | 0.353    | 0.547 | 0.666    | 1.024 | 0.466    | 0.423 |
| 0.576    | 1.090 | 0.389    | 0.594 | 0.707    | 1.079 | 0.495    | 0.448 |
| 0.591    | 1.106 | 0.412    | 0.617 | 0.725    | 1.098 | 0.509    | 0.451 |
| 0.621    | 1.149 | 0.429    | 0.635 | 0.739    | 1.119 | 0.519    | 0.463 |
| 0.654    | 1.192 | 0.446    | 0.658 | 0.757    | 1.141 | 0.535    | 0.480 |
| 0.689    | 1.250 | 0.464    | 0.677 | 0.770    | 1.177 | 0.551    | 0.491 |
| 0.729    | 1.348 | 0.491    | 0.704 | 0.789    | 1.208 | 0.570    | 0.510 |

|         |       |         |       |         |       |         |       |
|---------|-------|---------|-------|---------|-------|---------|-------|
| 0.761   | 1.472 | 0.519   | 0.747 | 0.806   | 1.244 | 0.590   | 0.530 |
| 0.794   | 1.638 | 0.556   | 0.789 | 0.832   | 1.295 | 0.610   | 0.556 |
| 0.823   | 1.885 | 0.586   | 0.827 | 0.862   | 1.347 | 0.637   | 0.570 |
| 0.851   | 2.105 | 0.622   | 0.871 | 0.889   | 1.419 | 0.664   | 0.591 |
| 0.907   | 2.205 | 0.642   | 0.897 | 0.922   | 1.489 | 0.698   | 0.644 |
| 1.037   | 2.267 | 0.661   | 0.927 | 0.950   | 1.555 | 0.730   | 0.674 |
| 1.083   | 2.284 | 0.692   | 0.965 | 0.975   | 1.609 | 0.766   | 0.692 |
| 1.178   | 2.324 | 0.717   | 1.003 | 0.985   | 1.653 | 0.810   | 0.744 |
| 1.352   | 2.407 | 0.723   | 1.014 | 1.006   | 1.717 | 0.847   | 0.800 |
| 1.44281 | 2.585 | 0.75105 | 1.042 | 1.01452 | 1.763 | 0.89323 | 0.862 |
| 1.45815 | 2.748 | 0.80048 | 1.116 | 1.02411 | 1.864 | 0.94223 | 0.923 |
| 1.46568 | 2.871 | 0.83457 | 1.18  | 1.02794 | 1.983 | 0.99194 | 1.023 |
| 1.46504 | 3.007 | 0.87703 | 1.251 | 1.03391 | 2.131 | 1.02709 | 1.166 |
| --      |       | 0.92696 | 1.357 | 1.03774 | 2.287 | 1.04988 | 1.342 |
| --      |       | 0.94414 | 1.447 | 1.04456 | 2.436 | 1.06011 | 1.53  |
| --      |       | 0.96317 | 1.577 | 1.05138 | 2.579 | 1.06956 | 1.681 |
| --      |       | 0.97141 | 1.75  | 1.05528 | 2.73  | 1.07651 | 1.874 |
| --      |       | 0.98192 | 1.932 | 1.06181 | 2.87  | 1.0866  | 2.027 |
| --      |       | 0.99279 | 2.1   | 1.0697  | 2.998 | 1.09626 | 2.174 |
| --      |       | 1.00514 | 2.254 | 1.07609 | 3.131 | 1.10726 | 2.334 |
| --      |       | 1.02127 | 2.428 | 1.09015 | 3.256 | 1.12892 | 2.487 |
| --      |       | 1.03682 | 2.602 | 1.11259 | 3.374 | 1.15151 | 2.657 |
| --      |       | 1.07808 | 2.754 | 1.13887 | 3.468 | 1.18716 | 2.78  |
| --      |       | 1.14071 | 2.869 | 1.17452 | 3.549 | 1.23765 | 2.91  |
| --      |       | 1.21663 | 2.975 | 1.21102 | 3.613 | 1.30256 | 3.017 |
| --      |       | 1.28764 | 3.052 | 1.24802 | 3.696 | 1.36704 | 3.108 |
| --      |       | 1.35724 | 3.144 | 1.29276 | 3.766 | 1.41732 | 3.228 |
| --      |       | 1.40446 | 3.258 | 1.3468  | 3.851 | 1.43876 | 3.336 |
| --      |       | 1.43429 | 3.405 | 1.3926  | 3.942 | 1.44615 | 3.394 |
| --      |       | 1.44537 | 3.544 | 1.42371 | 4.035 | 1.45197 | 3.423 |
| --      |       | 1.45332 | 3.651 | 1.44636 | 4.143 | 1.45162 | 3.442 |
| --      |       | 1.45637 | 3.7   | 1.44856 | 4.208 | 1.45715 | 3.466 |

**Table S8.** Experimentally measured values of pressure and mass during desorption of Hexane in MCM-41 at +80°C.

| 8 nm     |       | 10 nm    |       |
|----------|-------|----------|-------|
| Pressure | Mass  | Pressure | Mass  |
| bar      | g     | bar      | g     |
| 1.432    | 4.891 | 1.453    | 6.456 |
| 1.421    | 4.080 | 1.430    | 5.244 |
| 1.378    | 3.338 | 1.380    | 4.224 |
| 0.989    | 2.714 | 1.155    | 3.670 |
| 0.943    | 2.137 | 0.994    | 3.221 |
| 0.920    | 1.738 | 0.951    | 2.469 |
| 0.824    | 1.263 | 0.937    | 1.679 |
| 0.682    | 1.052 | 0.792    | 1.313 |
| 0.613    | 0.965 | 0.674    | 1.123 |
| 0.541    | 0.876 | 0.610    | 1.025 |
| 0.490    | 0.814 | 0.560    | 0.963 |
| 0.445    | 0.769 | 0.527    | 0.905 |
| 0.418    | 0.735 | 0.513    | 0.890 |
| 0.392    | 0.708 | 0.489    | 0.864 |
| 0.375    | 0.683 | 0.471    | 0.836 |
| 0.362    | 0.669 | 0.447    | 0.807 |
| 0.359    | 0.658 | 0.432    | 0.780 |
| 0.353    | 0.655 | 0.424    | 0.758 |
| 0.335    | 0.645 | 0.415    | 0.745 |
| 0.332    | 0.631 | 0.398    | 0.723 |
| 0.324    | 0.626 | 0.386    | 0.703 |
| --       |       | 0.369    | 0.685 |
| --       |       | 0.349    | 0.653 |

**Table S9.** Experimentally measured values of pressure and mass during adsorption of Hexane in MCM-41 at +90°C.

| 6 nm     |       | 8 nm     |       | 10 nm    |       | 12 nm    |       |
|----------|-------|----------|-------|----------|-------|----------|-------|
| Pressure | Mass  | Pressure | Mass  | Pressure | Mass  | Pressure | Mass  |
| bar      | g     | bar      | g     | bar      | g     | bar      | g     |
| 0.000    | 0.000 | 0.000    | 0.000 | 0.000    | 0.000 | 0.000    | 0.000 |
| 0.110    | 0.377 | 0.178    | 0.240 | 0.186    | 0.278 | 0.181    | 0.159 |
| 0.178    | 0.483 | 0.185    | 0.252 | 0.193    | 0.281 | 0.184    | 0.157 |

|       |       |       |       |       |       |       |       |
|-------|-------|-------|-------|-------|-------|-------|-------|
| 0.183 | 0.491 | 0.191 | 0.255 | 0.201 | 0.294 | 0.197 | 0.171 |
| 0.190 | 0.504 | 0.197 | 0.270 | 0.207 | 0.308 | 0.206 | 0.171 |
| 0.204 | 0.522 | 0.198 | 0.278 | 0.210 | 0.319 | 0.213 | 0.178 |
| 0.216 | 0.543 | 0.204 | 0.287 | 0.216 | 0.331 | 0.224 | 0.178 |
| 0.222 | 0.554 | 0.212 | 0.298 | 0.223 | 0.346 | 0.229 | 0.192 |
| 0.233 | 0.564 | 0.215 | 0.300 | 0.236 | 0.356 | 0.230 | 0.192 |
| 0.236 | 0.580 | 0.216 | 0.318 | 0.243 | 0.370 | 0.233 | 0.189 |
| 0.248 | 0.587 | 0.225 | 0.330 | 0.249 | 0.377 | 0.241 | 0.195 |
| 0.251 | 0.593 | 0.229 | 0.348 | 0.255 | 0.387 | 0.242 | 0.191 |
| 0.257 | 0.599 | 0.239 | 0.359 | 0.265 | 0.394 | 0.255 | 0.200 |
| 0.267 | 0.611 | 0.244 | 0.367 | 0.267 | 0.408 | 0.260 | 0.194 |
| 0.272 | 0.616 | 0.249 | 0.378 | 0.272 | 0.413 | 0.263 | 0.203 |
| 0.276 | 0.625 | 0.254 | 0.383 | 0.283 | 0.417 | 0.262 | 0.201 |
| 0.287 | 0.634 | 0.255 | 0.387 | 0.290 | 0.429 | 0.273 | 0.204 |
| 0.291 | 0.647 | 0.262 | 0.398 | 0.291 | 0.439 | 0.276 | 0.207 |
| 0.296 | 0.650 | 0.270 | 0.406 | 0.301 | 0.443 | 0.276 | 0.208 |
| 0.303 | 0.659 | 0.274 | 0.413 | 0.304 | 0.448 | 0.282 | 0.212 |
| 0.308 | 0.664 | 0.279 | 0.418 | 0.309 | 0.460 | 0.291 | 0.216 |
| 0.317 | 0.674 | 0.280 | 0.425 | 0.313 | 0.468 | 0.294 | 0.215 |
| 0.326 | 0.679 | 0.295 | 0.436 | 0.326 | 0.480 | 0.299 | 0.224 |
| 0.336 | 0.700 | 0.297 | 0.448 | 0.330 | 0.489 | 0.302 | 0.218 |
| 0.342 | 0.712 | 0.318 | 0.467 | 0.334 | 0.495 | 0.307 | 0.223 |
| 0.355 | 0.722 | 0.332 | 0.482 | 0.340 | 0.501 | 0.307 | 0.222 |
| 0.366 | 0.730 | 0.338 | 0.489 | 0.346 | 0.512 | 0.319 | 0.225 |
| 0.376 | 0.746 | 0.354 | 0.509 | 0.347 | 0.519 | 0.324 | 0.230 |
| 0.392 | 0.759 | 0.361 | 0.516 | 0.354 | 0.531 | 0.325 | 0.235 |
| 0.398 | 0.769 | 0.379 | 0.534 | 0.360 | 0.534 | 0.331 | 0.243 |
| 0.409 | 0.782 | 0.387 | 0.543 | 0.361 | 0.542 | 0.331 | 0.235 |
| 0.420 | 0.785 | 0.392 | 0.552 | 0.369 | 0.547 | 0.339 | 0.242 |
| 0.431 | 0.803 | 0.398 | 0.563 | 0.375 | 0.552 | 0.337 | 0.234 |
| 0.439 | 0.812 | 0.406 | 0.568 | 0.381 | 0.557 | 0.349 | 0.240 |
| 0.446 | 0.822 | 0.421 | 0.587 | 0.381 | 0.563 | 0.352 | 0.238 |
| 0.460 | 0.837 | 0.432 | 0.593 | 0.389 | 0.576 | 0.354 | 0.244 |
| 0.472 | 0.849 | 0.432 | 0.596 | 0.392 | 0.584 | 0.359 | 0.245 |
| 0.486 | 0.860 | 0.441 | 0.605 | 0.401 | 0.589 | 0.363 | 0.250 |



|         |       |         |       |         |       |         |       |
|---------|-------|---------|-------|---------|-------|---------|-------|
| 0.499   | 0.874 | 0.459   | 0.632 | 0.409   | 0.599 | 0.369   | 0.255 |
| 0.520   | 0.890 | 0.463   | 0.643 | 0.416   | 0.609 | 0.374   | 0.254 |
| 0.53183 | 0.905 | 0.4731  | 0.652 | 0.43    | 0.617 | 0.37517 | 0.254 |
| 0.54667 | 0.918 | 0.47154 | 0.65  | 0.43859 | 0.627 | 0.3849  | 0.263 |
| 0.55576 | 0.932 | 0.48595 | 0.67  | 0.44015 | 0.635 | 0.39328 | 0.266 |
| 0.57295 | 0.942 | 0.49497 | 0.678 | 0.44754 | 0.647 | 0.40386 | 0.268 |
| 0.6174  | 0.983 | 0.51294 | 0.692 | 0.46153 | 0.663 | 0.40791 | 0.279 |
| 0.66406 | 1.031 | 0.54057 | 0.713 | 0.47949 | 0.679 | 0.42772 | 0.293 |
| 0.72599 | 1.089 | 0.57558 | 0.742 | 0.49355 | 0.698 | 0.44796 | 0.299 |
| 0.80105 | 1.155 | 0.60718 | 0.776 | 0.51578 | 0.721 | 0.46266 | 0.305 |
| 0.87817 | 1.245 | 0.64872 | 0.82  | 0.53091 | 0.739 | 0.49036 | 0.326 |
| 0.9739  | 1.369 | 0.70326 | 0.864 | 0.55321 | 0.76  | 0.5025  | 0.341 |
| 1.04371 | 1.54  | 0.75879 | 0.92  | 0.57011 | 0.773 | 0.53453 | 0.367 |
| 1.08568 | 1.761 | 0.82796 | 0.983 | 0.59716 | 0.803 | 0.55583 | 0.371 |
| 1.11948 | 1.978 | 0.89443 | 1.049 | 0.62479 | 0.832 | 0.59688 | 0.406 |
| 1.16947 | 2.182 | 0.98185 | 1.141 | 0.65667 | 0.864 | 0.63679 | 0.448 |
| 1.42399 | 2.319 | 1.06196 | 1.24  | 0.68629 | 0.889 | 0.67841 | 0.46  |
| 1.82459 | 2.48  | 1.13766 | 1.336 | 0.7262  | 0.926 | 0.73422 | 0.506 |
| 1.91847 | 2.678 | 1.23907 | 1.48  | 0.77264 | 0.978 | 0.74743 | 0.515 |
| 1.9326  | 2.87  | 1.28523 | 1.661 | 0.82285 | 1.03  | 0.81909 | 0.558 |
| 1.95227 | 3.073 | 1.29915 | 1.854 | 0.87434 | 1.091 | 0.87064 | 0.599 |
| --      |       | 1.32159 | 2.083 | 0.94208 | 1.161 | 0.93555 | 0.642 |
| --      |       | 1.33877 | 2.301 | 1.00855 | 1.24  | 1.00983 | 0.706 |
| --      |       | 1.35759 | 2.479 | 1.06451 | 1.312 | 1.09796 | 0.784 |
| --      |       | 1.38088 | 2.668 | 1.13453 | 1.402 | 1.18943 | 0.868 |
| --      |       | 1.43961 | 2.854 | 1.21144 | 1.51  | 1.29148 | 0.988 |
| --      |       | 1.57596 | 3.051 | 1.28729 | 1.654 | 1.37911 | 1.163 |
| --      |       | 1.73049 | 3.19  | 1.34886 | 1.798 | 1.40652 | 1.351 |
| --      |       | 1.84873 | 3.335 | 1.37705 | 1.974 | 1.42406 | 1.556 |
| --      |       | 1.90015 | 3.534 | 1.38444 | 2.183 | 1.4404  | 1.749 |
| --      |       | 1.91506 | 3.709 | 1.39431 | 2.387 | 1.45183 | 1.934 |
| --      |       | 1.92514 | 3.904 | 1.40624 | 2.62  | 1.47555 | 2.177 |
| --      |       | 1.93381 | 4.082 | 1.41348 | 2.814 | 1.50047 | 2.387 |
| --      |       | 1.93771 | 4.245 | 1.42307 | 3.028 | 1.54443 | 2.604 |
| --      |       | 1.94531 | 4.415 | 1.44274 | 3.255 | 1.60536 | 2.785 |

|    |  |    |  |         |       |         |       |
|----|--|----|--|---------|-------|---------|-------|
| -- |  | -- |  | 1.48521 | 3.449 | 1.71607 | 2.977 |
| -- |  | -- |  | 1.59159 | 3.64  | 1.84873 | 3.129 |
| -- |  | -- |  | 1.71153 | 3.813 | 1.92145 | 3.317 |
| -- |  | -- |  | 1.83062 | 3.983 | 1.93445 | 3.464 |
| -- |  | -- |  | 1.89936 | 4.154 | 1.93998 | 3.581 |

**Table S10.** Experimentally measured values of pressure and mass during desorption of Hexane in MCM-41 at +90°C.

| 8 nm     |       | 10 nm    |       | 12 nm    |       |
|----------|-------|----------|-------|----------|-------|
| Pressure | Mass  | Pressure | Mass  | Pressure | Mass  |
| bar      | g     | bar      | g     | bar      | g     |
| 1.906    | 4.834 | 1.915    | 5.544 | 1.930    | 4.986 |
| 1.893    | 4.097 | 1.887    | 4.604 | 1.925    | 4.034 |
| 1.766    | 3.394 | 1.577    | 3.783 | 1.855    | 3.185 |
| 1.325    | 2.782 | 1.349    | 3.074 | 1.432    | 2.400 |
| 1.279    | 2.188 | 1.333    | 2.430 | 1.387    | 1.736 |
| 1.201    | 1.606 | 1.290    | 1.822 | 1.339    | 1.132 |
| 0.761    | 1.100 | 0.924    | 1.253 | 0.892    | 0.592 |
| 0.343    | 0.735 | 0.478    | 0.799 | 0.365    | 0.234 |
| 0.207    | 0.620 | 0.247    | 0.577 | 0.216    | 0.133 |
| 0.208    | 0.616 | 0.226    | 0.555 | 0.200    | 0.125 |
| 0.219    | 0.625 | 0.219    | 0.551 | 0.195    | 0.128 |
| 0.210    | 0.615 | 0.224    | 0.549 | 0.198    | 0.133 |
| 0.207    | 0.612 | 0.233    | 0.560 | 0.215    | 0.133 |
| 0.203    | 0.611 | 0.225    | 0.552 | 0.209    | 0.130 |
| 0.204    | 0.606 | 0.223    | 0.549 | 0.206    | 0.121 |
| 0.202    | 0.609 | 0.215    | 0.548 | 0.208    | 0.118 |
| --       |       | 0.215    | 0.544 | 0.208    | 0.121 |
| --       |       | 0.216    | 0.541 | 0.201    | 0.120 |
| --       |       | 0.218    | 0.542 | 0.199    | 0.116 |
| --       |       | 0.214    | 0.538 | 0.199    | 0.113 |
| --       |       | 0.213    | 0.535 | 0.196    | 0.116 |
| --       |       | 0.208    | 0.532 | 0.192    | 0.118 |

**Table S11.** Experimentally measured values of pressure and mass during adsorption of Hexane in MCM-41 at +100°C.

| 6 nm     |       | 8 nm     |       | 10 nm    |       | 12 nm    |       |
|----------|-------|----------|-------|----------|-------|----------|-------|
| Pressure | Mass  | Pressure | Mass  | Pressure | Mass  | Pressure | Mass  |
| bar      | g     | bar      | g     | bar      | g     | bar      | g     |
| 0.000    | 0.000 | 0.000    | 0.000 | 0.000    | 0.000 | 0.000    | 0.000 |
| 0.310    | 0.300 | 0.176    | 0.185 | 0.184    | 0.214 | 0.317    | 0.191 |
| 0.320    | 0.310 | 0.189    | 0.193 | 0.192    | 0.222 | 0.323    | 0.202 |
| 0.325    | 0.318 | 0.191    | 0.210 | 0.194    | 0.224 | 0.326    | 0.204 |
| 0.340    | 0.334 | 0.191    | 0.221 | 0.206    | 0.238 | 0.343    | 0.214 |
| 0.349    | 0.340 | 0.210    | 0.233 | 0.214    | 0.255 | 0.348    | 0.222 |
| 0.366    | 0.348 | 0.210    | 0.242 | 0.226    | 0.267 | 0.358    | 0.232 |
| 0.371    | 0.360 | 0.214    | 0.249 | 0.232    | 0.275 | 0.362    | 0.229 |
| 0.390    | 0.371 | 0.223    | 0.252 | 0.247    | 0.283 | 0.366    | 0.230 |
| 0.401    | 0.382 | 0.227    | 0.258 | 0.249    | 0.289 | 0.373    | 0.232 |
| 0.416    | 0.396 | 0.245    | 0.294 | 0.337    | 0.386 | 0.385    | 0.240 |
| 0.424    | 0.404 | 0.252    | 0.297 | 0.342    | 0.388 | 0.392    | 0.238 |
| 0.439    | 0.413 | 0.264    | 0.300 | 0.351    | 0.396 | 0.404    | 0.255 |
| 0.456    | 0.432 | 0.264    | 0.297 | 0.361    | 0.408 | 0.416    | 0.252 |
| 0.467    | 0.441 | 0.270    | 0.304 | 0.371    | 0.413 | 0.417    | 0.253 |
| 0.481    | 0.453 | 0.275    | 0.314 | 0.371    | 0.420 | 0.425    | 0.251 |
| 0.503    | 0.473 | 0.284    | 0.316 | 0.380    | 0.427 | 0.435    | 0.276 |
| 0.527    | 0.497 | 0.291    | 0.328 | 0.387    | 0.433 | 0.436    | 0.278 |
| 0.548    | 0.508 | 0.303    | 0.359 | 0.392    | 0.444 | 0.456    | 0.294 |
| 0.575    | 0.529 | 0.316    | 0.364 | 0.401    | 0.452 | 0.463    | 0.307 |
| 0.596    | 0.546 | 0.317    | 0.373 | 0.408    | 0.460 | 0.476    | 0.306 |
| 0.614    | 0.562 | 0.330    | 0.387 | 0.417    | 0.465 | 0.491    | 0.319 |
| 0.649    | 0.585 | 0.336    | 0.394 | 0.425    | 0.472 | 0.517    | 0.344 |
| 0.673    | 0.607 | 0.351    | 0.404 | 0.433    | 0.481 | 0.527    | 0.350 |
| 0.704    | 0.633 | 0.356    | 0.418 | 0.436    | 0.483 | 0.536    | 0.358 |
| 0.743    | 0.655 | 0.382    | 0.431 | 0.448    | 0.499 | 0.545    | 0.355 |
| 0.783    | 0.688 | 0.382    | 0.431 | 0.454    | 0.505 | 0.552    | 0.359 |
| 0.828    | 0.721 | 0.397    | 0.445 | 0.467    | 0.516 | 0.562    | 0.369 |
| 0.878    | 0.760 | 0.416    | 0.458 | 0.478    | 0.526 | 0.570    | 0.375 |
| 0.925    | 0.795 | 0.426    | 0.468 | 0.485    | 0.534 | 0.608    | 0.391 |

|         |       |         |       |         |       |         |       |
|---------|-------|---------|-------|---------|-------|---------|-------|
| 0.992   | 0.839 | 0.433   | 0.480 | 0.498   | 0.548 | 0.612   | 0.400 |
| 1.063   | 0.900 | 0.452   | 0.489 | 0.510   | 0.558 | 0.615   | 0.395 |
| 1.146   | 0.961 | 0.461   | 0.505 | 0.517   | 0.565 | 0.653   | 0.422 |
| 1.260   | 1.061 | 0.466   | 0.502 | 0.524   | 0.571 | 0.669   | 0.431 |
| 1.389   | 1.215 | 0.489   | 0.532 | 0.535   | 0.577 | 0.743   | 0.468 |
| 1.460   | 1.426 | 0.505   | 0.542 | 0.544   | 0.585 | 0.770   | 0.484 |
| 1.512   | 1.658 | 0.515   | 0.553 | 0.559   | 0.593 | 0.878   | 0.538 |
| 1.570   | 1.896 | 0.527   | 0.554 | 0.569   | 0.603 | 0.968   | 0.579 |
| 1.970   | 2.077 | 0.550   | 0.568 | 0.576   | 0.612 | 1.048   | 0.624 |
| 2.464   | 2.273 | 0.561   | 0.575 | 0.592   | 0.619 | 1.147   | 0.685 |
| 2.52295 | 2.449 | 0.59163 | 0.594 | 0.60462 | 0.631 | 1.20569 | 0.712 |
| 2.53715 | 2.607 | 0.60157 | 0.608 | 0.61925 | 0.642 | 1.29545 | 0.769 |
| 2.56541 | 2.825 | 0.62884 | 0.629 | 0.65696 | 0.666 | 1.43812 | 0.867 |
| 2.57649 | 3.019 | 0.64283 | 0.644 | 0.69964 | 0.698 | 1.62461 | 1.016 |
| 2.57827 | 3.16  | 0.66399 | 0.662 | 0.74736 | 0.735 | 1.79178 | 1.197 |
| 2.58409 | 3.28  | 0.69026 | 0.677 | 0.79856 | 0.777 | 1.86016 | 1.378 |
| --      |       | 0.71405 | 0.695 | 0.86546 | 0.827 | 1.88708 | 1.577 |
| --      |       | 0.73941 | 0.715 | 0.9298  | 0.882 | 1.90043 | 1.789 |
| --      |       | 0.76185 | 0.735 | 1.02048 | 0.951 | 1.92003 | 1.972 |
| --      |       | 0.79842 | 0.76  | 1.10648 | 1.02  | 1.94893 | 2.167 |
| --      |       | 0.8705  | 0.813 | 1.21308 | 1.109 | 1.96349 | 2.363 |
| --      |       | 0.96232 | 0.877 | 1.32798 | 1.213 | 2.0066  | 2.534 |
| --      |       | 1.06025 | 0.945 | 1.45233 | 1.331 | 2.0551  | 2.731 |
| --      |       | 1.15847 | 1.016 | 1.58896 | 1.481 | 2.14216 | 2.913 |
| --      |       | 1.27578 | 1.112 | 1.72616 | 1.666 | 2.28988 | 3.075 |
| --      |       | 1.42846 | 1.247 | 1.83027 | 1.855 | 2.45342 | 3.243 |
| --      |       | 1.59521 | 1.415 | 1.84781 | 2.049 | 2.51066 | 3.383 |
| --      |       | 1.71281 | 1.605 | 1.86741 | 2.249 | 2.52721 | 3.509 |
| --      |       | 1.73745 | 1.825 | 1.87849 | 2.626 | 2.53232 | 3.624 |
| --      |       | 1.75975 | 2.037 | 1.89439 | 2.819 | 2.54226 | 3.723 |
| --      |       | 1.78049 | 2.237 | 1.89929 | 3.013 | 2.55085 | 3.888 |
| --      |       | 1.80839 | 2.453 | 1.91918 | 3.221 | 2.55831 | 3.98  |
| --      |       | 1.83907 | 2.642 | 1.97613 | 3.408 | 2.55469 | 4.053 |
| --      |       | 1.90739 | 2.822 | 2.09032 | 3.587 | 2.56364 | 4.126 |
| --      |       | 2.09366 | 3.013 | 2.23036 | 3.76  | --      |       |

|    |  |         |       |         |       |    |  |
|----|--|---------|-------|---------|-------|----|--|
| -- |  | 2.29584 | 3.159 | 2.3812  | 3.931 | -- |  |
| -- |  | 2.44469 | 3.333 | 2.47146 | 4.09  | -- |  |
| -- |  | 2.49632 | 3.521 | 2.51023 | 4.248 | -- |  |
| -- |  | 2.51165 | 3.707 | 2.52692 | 4.409 | -- |  |
| -- |  | 2.52607 | 3.892 | 2.53679 | 4.517 | -- |  |
| -- |  | 2.53168 | 4.055 | 2.54262 | 4.579 | -- |  |
| -- |  | 2.53963 | 4.231 | --      |       | -- |  |
| -- |  | 2.54084 | 4.398 | --      |       | -- |  |
| -- |  | 2.54603 | 4.575 | --      |       | -- |  |
| -- |  | 2.54816 | 4.765 | --      |       | -- |  |
| -- |  | 2.55036 | 4.891 | --      |       | -- |  |
| -- |  | 2.55647 | 5.015 | --      |       | -- |  |
| -- |  | 2.5537  | 5.14  | --      |       | -- |  |
| -- |  | 2.55831 | 5.26  | --      |       | -- |  |

**Table S12.** Experimentally measured values of pressure and mass during desorption of Hexane in MCM-41 at +100°C.

| 6 nm     |       | 8 nm     |       | 10 nm    |       | 12 nm    |       |
|----------|-------|----------|-------|----------|-------|----------|-------|
| Pressure | Mass  | Pressure | Mass  | Pressure | Mass  | Pressure | Mass  |
| bar      | g     | bar      | g     | bar      | g     | bar      | g     |
| 2.548    | 3.859 | 2.489    | 4.116 | 2.536    | 5.582 | 2.551    | 5.268 |
| 2.545    | 3.111 | 2.450    | 3.545 | 2.506    | 4.895 | 2.548    | 5.100 |
| 2.498    | 2.449 | 2.012    | 3.052 | 2.425    | 4.133 | 2.508    | 4.052 |
| 1.828    | 2.093 | 1.758    | 2.573 | 1.937    | 3.516 | 2.503    | 3.663 |
| 1.491    | 1.672 | 1.711    | 2.101 | 1.802    | 2.844 | 2.182    | 3.020 |
| 1.359    | 1.227 | 1.656    | 1.633 | 1.780    | 2.225 | 1.910    | 2.457 |
| 1.048    | 0.926 | 1.322    | 1.234 | 1.649    | 1.654 | 1.849    | 1.880 |
| 0.815    | 0.755 | 0.901    | 0.918 | 1.226    | 1.199 | 1.796    | 1.320 |
| 0.677    | 0.653 | 0.587    | 0.707 | 0.771    | 0.831 | 1.388    | 0.838 |
| 0.603    | 0.592 | 0.509    | 0.656 | 0.419    | 0.570 | 0.939    | 0.568 |
| 0.535    | 0.554 | 0.454    | 0.617 | 0.313    | 0.486 | 0.742    | 0.462 |
| 0.484    | 0.518 | 0.416    | 0.595 | 0.295    | 0.473 | 0.604    | 0.389 |
| 0.456    | 0.485 | 0.398    | 0.578 | 0.275    | 0.456 | 0.544    | 0.368 |
| 0.437    | 0.476 | 0.604    | 0.722 | 0.264    | 0.445 | 0.484    | 0.328 |
| 0.419    | 0.458 | 0.565    | 0.694 | 0.259    | 0.441 | 0.458    | 0.323 |
| 0.416    | 0.464 | 0.526    | 0.669 | 0.263    | 0.439 | 0.418    | 0.298 |
| 0.402    | 0.459 | 0.497    | 0.652 | 0.258    | 0.435 | 0.396    | 0.283 |
| 0.529    | 0.545 | 0.478    | 0.638 | 0.253    | 0.438 | 0.371    | 0.265 |
| 0.504    | 0.538 | 0.457    | 0.630 | 0.254    | 0.439 | 0.358    | 0.257 |
| 0.479    | 0.519 | 0.433    | 0.615 | 0.254    | 0.439 | 0.348    | 0.253 |
| 0.462    | 0.502 | 0.427    | 0.608 | 0.255    | 0.437 | 0.347    | 0.253 |
| 0.449    | 0.484 | 0.408    | 0.599 | 0.248    | 0.433 | 0.354    | 0.259 |
| 0.434    | 0.482 | 0.404    | 0.593 | 0.245    | 0.430 | 0.343    | 0.259 |
| 0.423    | 0.470 | 0.393    | 0.584 | 0.241    | 0.427 | 0.334    | 0.249 |
| 0.416    | 0.461 | 0.378    | 0.572 | 0.240    | 0.428 | 0.322    | 0.248 |
| 0.412    | 0.458 | 0.371    | 0.572 | 0.231    | 0.417 | 0.319    | 0.243 |
| 0.404    | 0.450 | 0.369    | 0.567 | 0.228    | 0.415 | 0.307    | 0.229 |
| 0.396    | 0.449 | 0.356    | 0.561 | 0.227    | 0.413 | 0.322    | 0.230 |
| 0.389    | 0.439 | 0.357    | 0.563 | 0.225    | 0.414 | 0.304    | 0.231 |
| 0.386    | 0.444 | 0.359    | 0.564 | 0.228    | 0.409 | 0.310    | 0.224 |

|         |       |         |       |         |       |         |       |
|---------|-------|---------|-------|---------|-------|---------|-------|
| 0.380   | 0.433 | 0.355   | 0.559 | 0.219   | 0.407 | 0.295   | 0.218 |
| 0.377   | 0.429 | 0.356   | 0.558 | 0.215   | 0.407 | 0.292   | 0.222 |
| 0.371   | 0.431 | 0.348   | 0.554 | 0.217   | 0.409 | 0.296   | 0.216 |
| 0.364   | 0.424 | 0.337   | 0.551 | 0.277   | 0.468 | 0.290   | 0.216 |
| 0.369   | 0.417 | 0.333   | 0.547 | 0.289   | 0.481 | 0.283   | 0.203 |
| 0.361   | 0.411 | 0.333   | 0.546 | 0.285   | 0.484 | 0.279   | 0.199 |
| 0.353   | 0.406 | 0.325   | 0.543 | 0.285   | 0.475 | 0.274   | 0.197 |
| 0.350   | 0.399 | 0.324   | 0.540 | 0.281   | 0.474 | 0.270   | 0.203 |
| 0.346   | 0.400 | 0.319   | 0.539 | 0.289   | 0.476 | 0.267   | 0.200 |
| 0.330   | 0.389 | 0.326   | 0.541 | 0.284   | 0.470 | 0.266   | 0.202 |
| 0.32617 | 0.386 | 0.31658 | 0.537 | 0.27256 | 0.47  | 0.26176 | 0.2   |
| 0.32631 | 0.378 | 0.31076 | 0.532 | 0.26971 | 0.466 | 0.26126 | 0.202 |
| 0.32134 | 0.372 | 0.30749 | 0.525 | 0.27078 | 0.459 | 0.25324 | 0.197 |
| 0.31708 | 0.373 | 0.30224 | 0.523 | 0.27085 | 0.45  | 0.24813 | 0.194 |
| 0.30494 | 0.363 | 0.29684 | 0.521 | 0.26155 | 0.451 | 0.24124 | 0.194 |
| 0.30181 | 0.362 | 0.294   | 0.519 | 0.26162 | 0.447 | 0.24195 | 0.205 |
| 0.29464 | 0.352 | 0.29002 | 0.517 | 0.25125 | 0.444 | 0.23385 | 0.189 |
| 0.28995 | 0.349 | 0.2815  | 0.514 | 0.25587 | 0.442 | 0.23293 | 0.183 |
| 0.27781 | 0.341 | 0.2727  | 0.508 | 0.24543 | 0.433 | 0.2357  | 0.182 |
| 0.26481 | 0.326 | 0.26872 | 0.507 | 0.2384  | 0.43  | 0.22107 | 0.178 |
| 0.24834 | 0.314 | 0.26325 | 0.495 | 0.23414 | 0.43  | 0.21446 | 0.18  |
| 0.24031 | 0.303 | 0.23818 | 0.489 | 0.23151 | 0.425 | 0.20956 | 0.177 |
| 0.22718 | 0.297 | 0.22973 | 0.48  | 0.2276  | 0.43  | 0.20722 | 0.173 |
| 0.22142 | 0.288 | 0.23115 | 0.475 | 0.22966 | 0.427 | 0.20694 | 0.17  |
| 0.22135 | 0.28  | 0.22867 | 0.473 | 0.22909 | 0.423 | 0.20857 | 0.168 |
| 0.21766 | 0.281 | 0.22121 | 0.469 | 0.22221 | 0.422 | 0.20978 | 0.173 |
| 0.21844 | 0.28  | 0.21631 | 0.468 | 0.30529 | 0.5   | 0.20481 | 0.176 |
| 0.21212 | 0.278 | 0.21347 | 0.468 | 0.30188 | 0.49  | 0.20275 | 0.169 |
| 0.21439 | 0.283 | 0.21589 | 0.468 | 0.29429 | 0.48  | 0.20339 | 0.169 |
| 0.21674 | 0.28  | 0.20956 | 0.469 | 0.29201 | 0.477 | 0.19856 | 0.164 |
| 0.21028 | 0.281 | 0.20488 | 0.472 | 0.28363 | 0.475 | 0.20275 | 0.163 |
| 0.20751 | 0.272 | 0.20594 | 0.47  | 0.2825  | 0.472 | 0.20317 | 0.172 |
| 0.20296 | 0.262 | 0.21233 | 0.473 | 0.27909 | 0.47  | 0.20324 | 0.156 |
| 0.20204 | 0.269 | 0.21347 | 0.476 | 0.2744  | 0.466 | 0.20552 | 0.168 |
| 0.20012 | 0.267 | 0.20587 | 0.47  | 0.27327 | 0.461 | 0.19856 | 0.162 |



|         |       |         |       |         |       |         |       |
|---------|-------|---------|-------|---------|-------|---------|-------|
| 0.19792 | 0.271 | 0.20445 | 0.465 | 0.27149 | 0.466 | 0.20218 | 0.162 |
| 0.19934 | 0.271 | 0.20722 | 0.468 | 0.27142 | 0.466 | 0.26489 | 0.209 |
| 0.20005 | 0.273 | 0.20701 | 0.472 | 0.26112 | 0.458 | 0.26027 | 0.2   |
| 0.20474 | 0.272 | 0.20161 | 0.471 | 0.25217 | 0.452 | 0.26084 | 0.198 |
| 0.19692 | 0.266 | 0.19998 | 0.474 | 0.2396  | 0.44  | 0.25466 | 0.194 |
| 0.19806 | 0.267 | 0.19671 | 0.472 | 0.23186 | 0.437 | 0.25054 | 0.189 |
| 0.19806 | 0.265 | 0.19984 | 0.471 | 0.22718 | 0.428 | 0.25253 | 0.174 |
| 0.19806 | 0.264 | 0.20332 | 0.47  | 0.21695 | 0.43  | 0.24571 | 0.182 |
| 0.19714 | 0.258 | 0.19884 | 0.472 | 0.21461 | 0.427 | 0.24514 | 0.182 |
| 0.19728 | 0.261 | 0.19728 | 0.467 | 0.21454 | 0.424 | 0.24436 | 0.181 |
| 0.19579 | 0.257 | 0.20048 | 0.468 | 0.21191 | 0.424 | 0.23463 | 0.181 |
| --      |       | 0.19763 | 0.468 | 0.20573 | 0.421 | 0.23208 | 0.177 |
| --      |       | 0.19359 | 0.47  | 0.20346 | 0.422 | 0.22554 | 0.186 |
| --      |       | 0.19039 | 0.466 | 0.20587 | 0.427 | 0.22306 | 0.184 |
| --      |       | --      |       | 0.21006 | 0.424 | 0.21908 | 0.18  |
| --      |       | --      |       | 0.20878 | 0.424 | 0.22086 | 0.175 |
| --      |       | --      |       | 0.21049 | 0.42  | 0.21262 | 0.166 |
| --      |       | --      |       | 0.21205 | 0.421 | 0.21042 | 0.159 |
| --      |       | --      |       | 0.20367 | 0.42  | 0.20978 | 0.154 |
| --      |       | --      |       | --      |       | 0.2085  | 0.158 |
